# Supplementary material for: Removal of hydrogen sulfide from a biogas mimic by using impregnated activated carbon adsorbent
Source: PubMed Central journal article supplement (PMC6372171; doi:10.1371/journal.pone.0211713), 2019-02-12

Electron Image 6

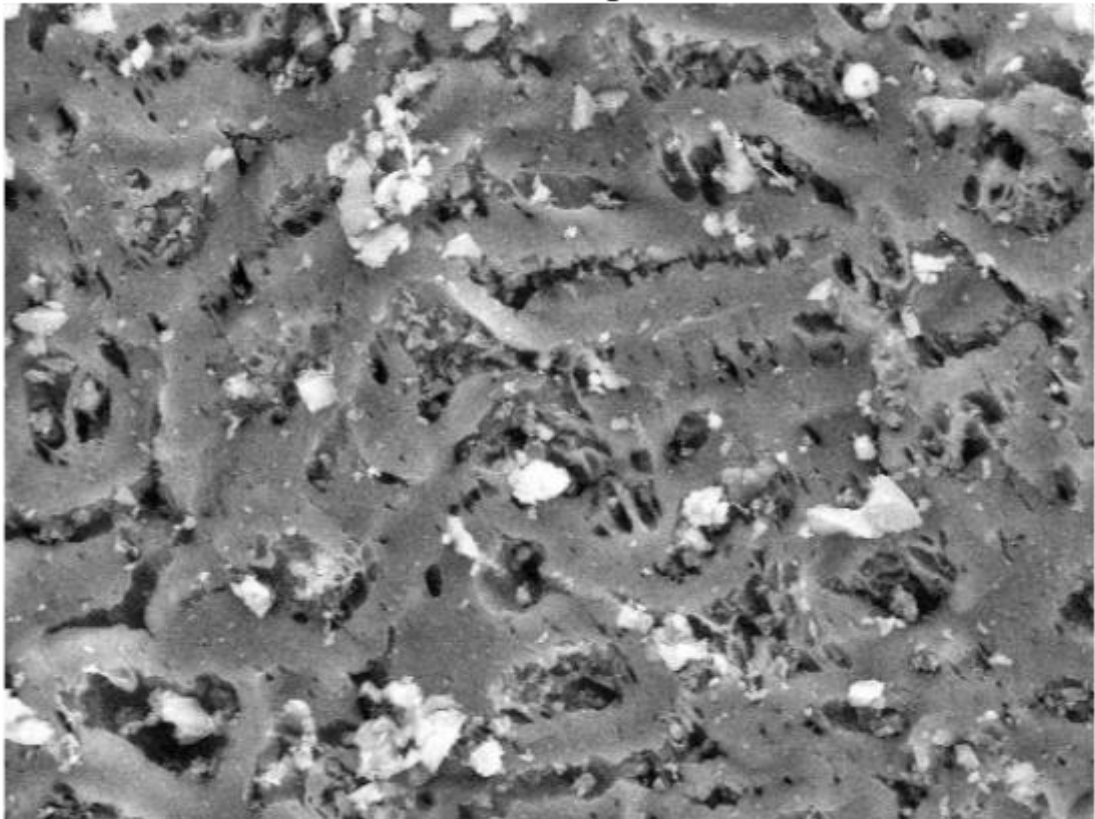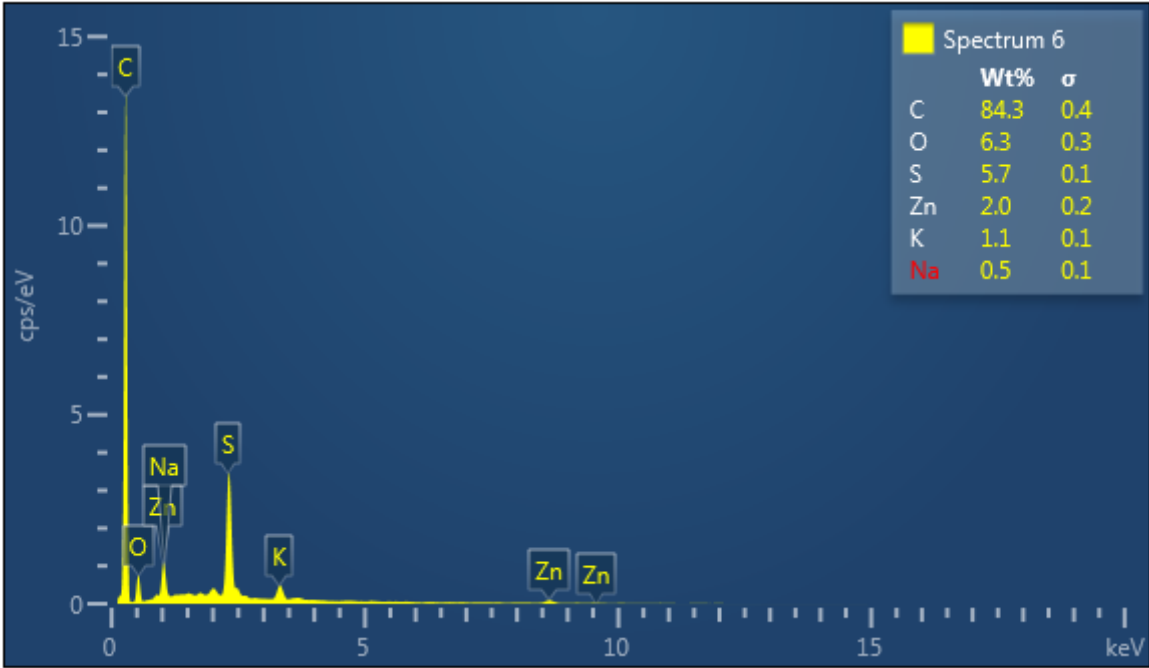

Electron Image 5

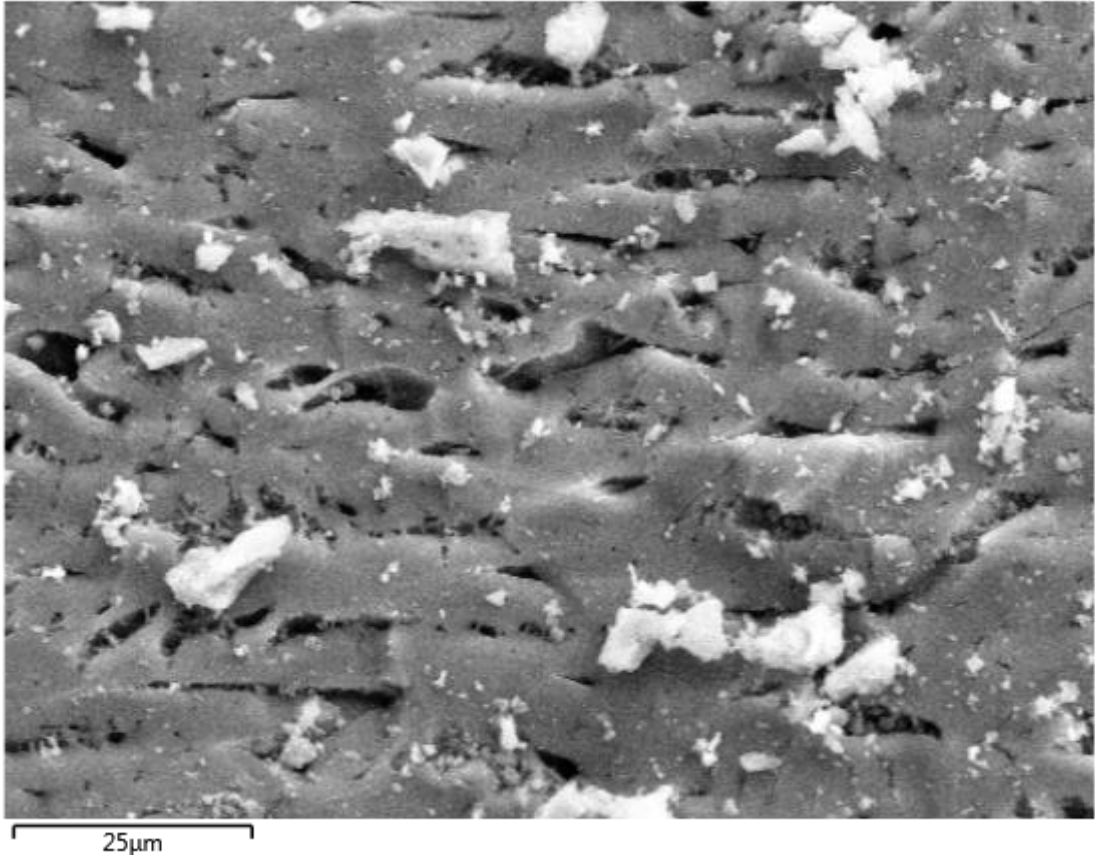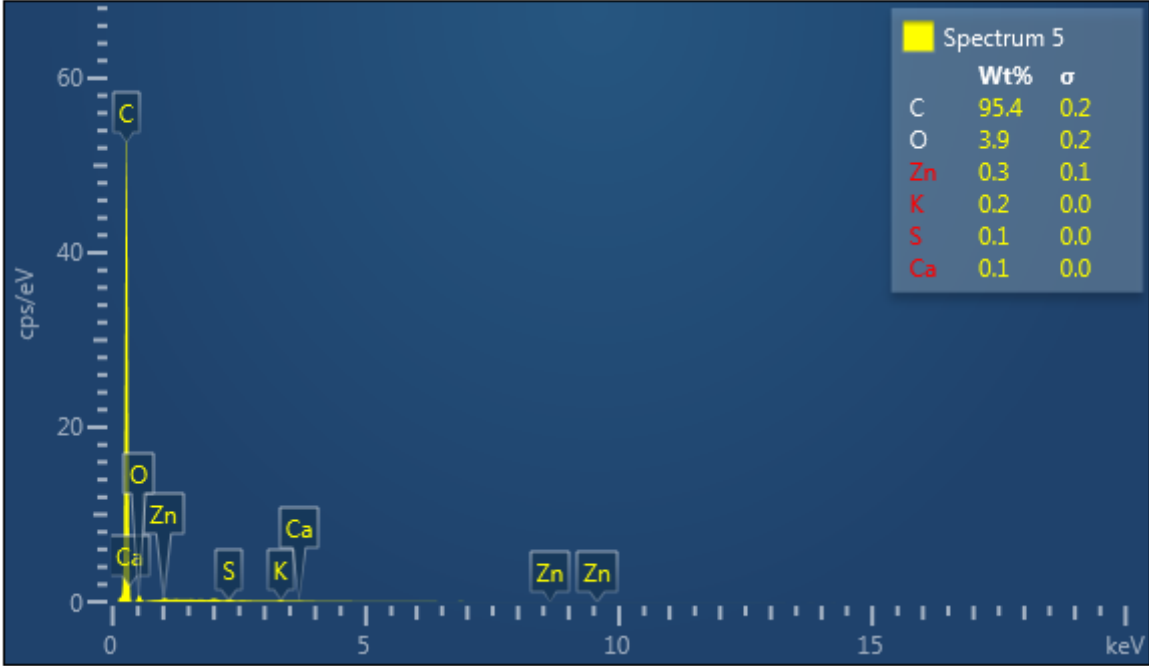

Supplement: pone.0211713.s001.pdf [file pone.0211713.s001.pdf]
