# Supplementary material for: Removal of hydrogen sulfide from a biogas mimic by using impregnated activated carbon adsorbent
Source: PubMed Central journal article supplement (PMC6372171; doi:10.1371/journal.pone.0211713), 2019-02-12
Supplement: pone.0211713.s002.pdf [file pone.0211713.s002.pdf]

# EDAX TEAM EDS

1\_1kx.spc

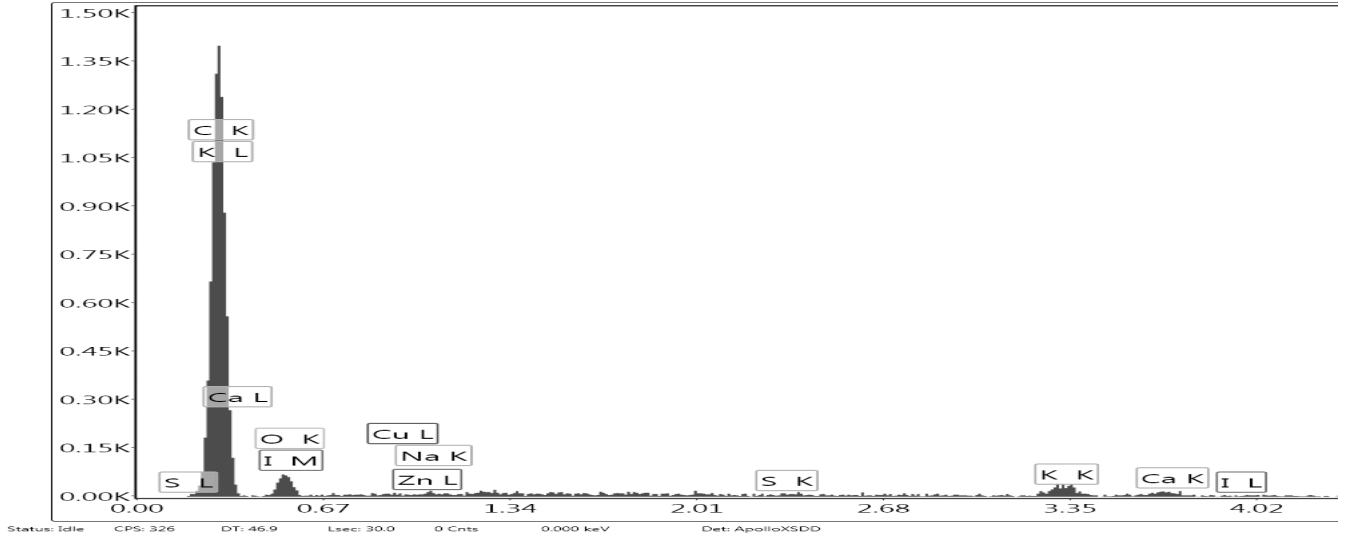

| Element | Weight % | Weight % | Atomic % | Error % | Net Intensity | Net Int. Error % | K Ratio | Z      | R      | A    |
|---------|----------|----------|----------|---------|---------------|------------------|---------|--------|--------|------|
| C K     | 80.56    | 80.56    | 91.36    | 5.35    | 212.79        | 2.05             | 0.7067  | 1.0412 | 0.9801 | 0.84 |
| O K     | 5.21     | 5.21     | 4.44     | 35.37   | 6.79          | 26.35            | 0.0141  | 0.9834 | 0.9986 | 0.27 |
| Cu L    | 0.22     | 0.22     | 0.05     | 86.13   | 0.52          | 83.31            | 0.0014  | 0.7040 | 1.1620 | 0.90 |
| Zn L    | 0.29     | 0.29     | 0.06     | 78.95   | 0.71          | 76.82            | 0.0020  | 0.7036 | 1.1668 | 0.97 |
| Na K    | 0.04     | 0.04     | 0.02     | 104.42  | 0.20          | 100.00           | 0.0002  | 0.8806 | 1.0198 | 0.74 |
| S K     | 1.13     | 1.13     | 0.48     | 27.06   | 3.84          | 24.83            | 0.0098  | 0.8487 | 1.0434 | 0.99 |
| K K     | 6.24     | 6.24     | 2.17     | 14.02   | 13.79         | 11.31            | 0.0512  | 0.7956 | 1.0507 | 1.00 |
| Ca K    | 3.19     | 3.19     | 1.08     | 22.56   | 5.48          | 19.74            | 0.0259  | 0.8070 | 1.0516 | 1.00 |
| I L     | 3.12     | 3.12     | 0.33     | 69.97   | 1.28          | 66.43            | 0.0180  | 0.5527 | 1.1775 | 1.04 |

# EDAX TEAM EDS

2\_1kx.spc

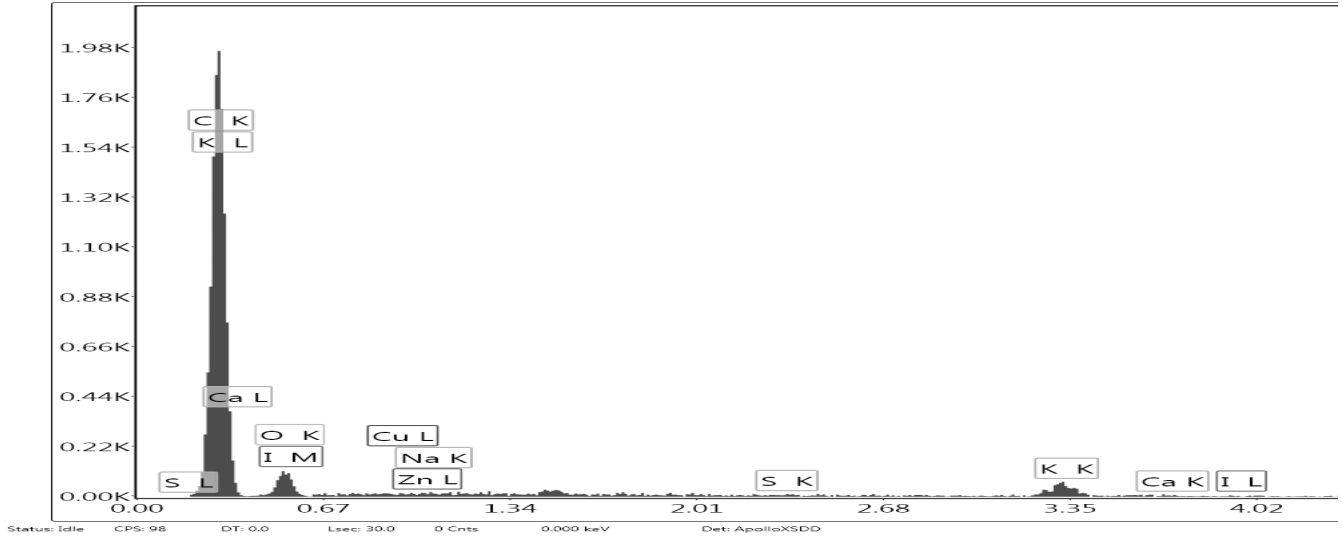

| Element | Weight % | Weight % | Atomic % | Error % | Net Intensity | Net Int. Error % | K Ratio | Z      | R      | A    |
|---------|----------|----------|----------|---------|---------------|------------------|---------|--------|--------|------|
| C K     | 81.34    | 81.34    | 90.24    | 4.62    | 310.78        | 1.55             | 0.7269  | 1.0329 | 0.9847 | 0.86 |
| O K     | 7.93     | 7.93     | 6.61     | 22.84   | 15.03         | 13.91            | 0.0219  | 0.9751 | 1.0028 | 0.28 |
| Cu L    | 0.28     | 0.28     | 0.06     | 75.48   | 0.96          | 72.75            | 0.0018  | 0.6979 | 1.1662 | 0.91 |
| Zn L    | 0.42     | 0.42     | 0.09     | 69.05   | 1.49          | 67.02            | 0.0029  | 0.6974 | 1.1709 | 0.98 |
| Na K    | 0.00     | 0.00     | 0.00     | 104.35  | 0.03          | 100.00           | 0.0000  | 0.8728 | 1.0234 | 0.75 |
| S K     | 0.71     | 0.71     | 0.29     | 33.22   | 3.38          | 31.00            | 0.0061  | 0.8409 | 1.0460 | 0.99 |
| K K     | 6.81     | 6.81     | 2.32     | 12.76   | 20.88         | 10.04            | 0.0545  | 0.7881 | 1.0528 | 1.01 |
| Ca K    | 0.58     | 0.58     | 0.19     | 77.13   | 1.39          | 74.30            | 0.0046  | 0.7993 | 1.0535 | 1.00 |
| I L     | 1.93     | 1.93     | 0.20     | 69.72   | 1.11          | 66.16            | 0.0110  | 0.5473 | 1.1793 | 1.04 |

# EDAX TEAM EDS

3\_1kx.spc

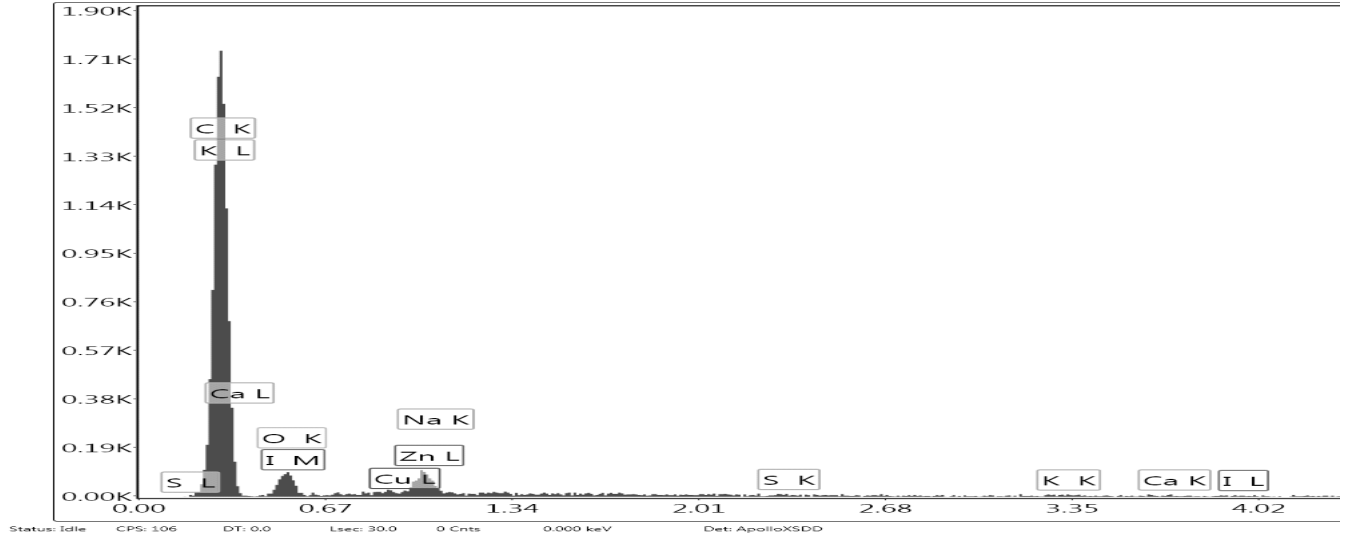

| Element | Weight % | Weight % | Atomic % | Error % | Net Intensity | Net Int. Error % | K Ratio | Z      | R      | A    |
|---------|----------|----------|----------|---------|---------------|------------------|---------|--------|--------|------|
| C K     | 90.18    | 90.18    | 95.84    | 5.50    | 262.69        | 2.26             | 0.7810  | 1.0214 | 0.9893 | 0.84 |
| O K     | 3.62     | 3.62     | 2.89     | 60.97   | 5.38          | 52.07            | 0.0100  | 0.9639 | 1.0069 | 0.28 |
| Cu L    | 0.08     | 0.08     | 0.02     | 102.22  | 0.23          | 100.00           | 0.0005  | 0.6897 | 1.1703 | 0.96 |
| Zn L    | 4.37     | 4.37     | 0.85     | 14.90   | 12.45         | 12.78            | 0.0308  | 0.6892 | 1.1749 | 1.02 |
| Na K    | 0.00     | 0.00     | 0.00     | 104.18  | 0.03          | 100.00           | 0.0000  | 0.8626 | 1.0269 | 0.76 |
| S K     | 0.21     | 0.21     | 0.08     | 86.25   | 0.77          | 84.02            | 0.0018  | 0.8308 | 1.0486 | 0.99 |
| K K     | 0.47     | 0.47     | 0.15     | 76.18   | 1.13          | 73.46            | 0.0037  | 0.7785 | 1.0548 | 1.01 |
| Ca K    | 0.25     | 0.25     | 0.08     | 96.86   | 0.47          | 93.96            | 0.0020  | 0.7896 | 1.0553 | 1.01 |
| I L     | 0.81     | 0.81     | 0.08     | 89.93   | 0.37          | 86.32            | 0.0046  | 0.5406 | 1.1810 | 1.05 |

# EDAX TEAM EDS

4\_1kx.spc

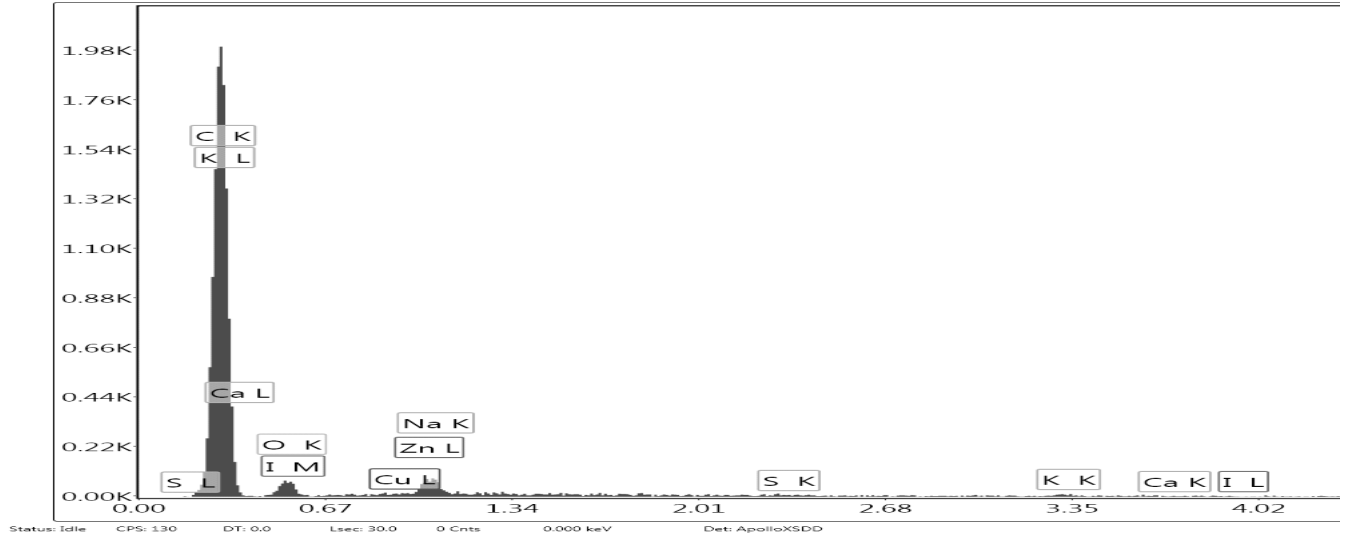

| Element | Weight % | Weight % | Atomic % | Error % | Net Intensity | Net Int. Error % | K Ratio | Z      | R      | A    |
|---------|----------|----------|----------|---------|---------------|------------------|---------|--------|--------|------|
| C K     | 90.69    | 90.69    | 94.22    | 4.18    | 316.63        | 1.49             | 0.8285  | 1.0113 | 0.9954 | 0.90 |
| O K     | 5.52     | 5.52     | 4.30     | 29.25   | 9.28          | 20.36            | 0.0152  | 0.9539 | 1.0122 | 0.28 |
| Cu L    | 0.00     | 0.00     | 0.00     | 102.25  | 0.01          | 100.00           | 0.0000  | 0.6822 | 1.1757 | 0.95 |
| Zn L    | 0.39     | 0.39     | 0.07     | 81.08   | 1.25          | 78.90            | 0.0027  | 0.6817 | 1.1802 | 1.03 |
| Na K    | 1.78     | 1.78     | 0.97     | 15.11   | 12.89         | 11.13            | 0.0120  | 0.8531 | 1.0314 | 0.78 |
| S K     | 0.31     | 0.31     | 0.12     | 71.94   | 1.27          | 69.67            | 0.0026  | 0.8211 | 1.0518 | 1.00 |
| K K     | 0.69     | 0.69     | 0.22     | 68.62   | 1.84          | 65.88            | 0.0054  | 0.7692 | 1.0574 | 1.01 |
| Ca K    | 0.16     | 0.16     | 0.05     | 96.18   | 0.34          | 93.26            | 0.0012  | 0.7800 | 1.0576 | 1.01 |
| I L     | 0.46     | 0.46     | 0.05     | 92.46   | 0.23          | 88.83            | 0.0026  | 0.5340 | 1.1832 | 1.05 |

# EDAX TEAM EDS

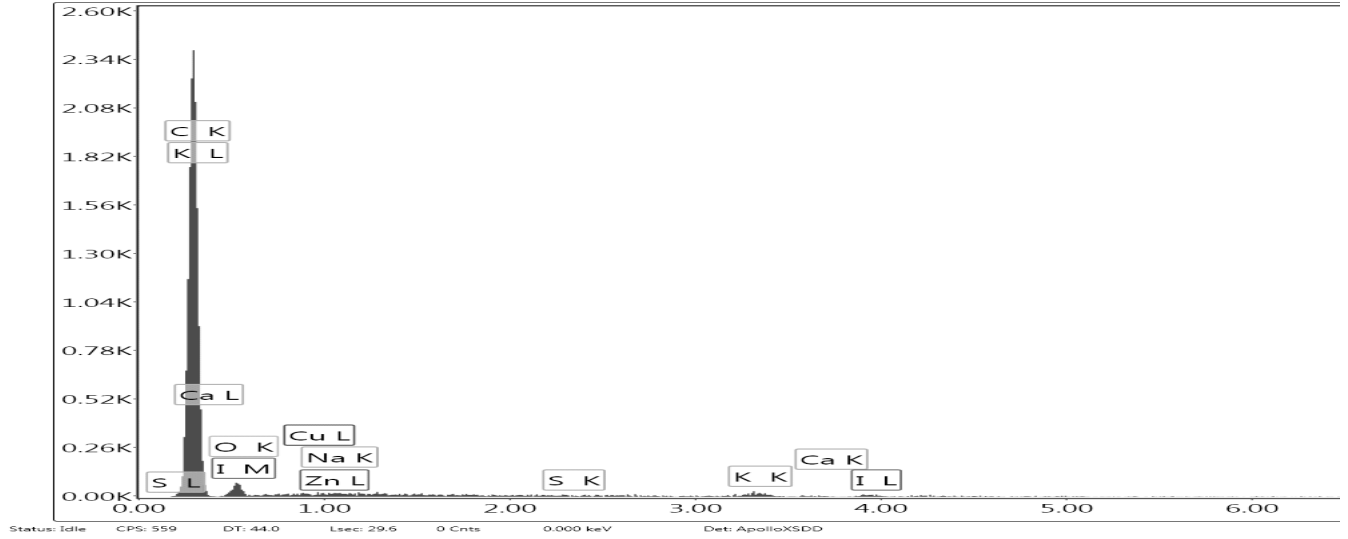

| Element | Weight % | Weight % | Atomic % | Error % | Net Intensity | Net Int. Error % | K Ratio | Z      | R      | A    |
|---------|----------|----------|----------|---------|---------------|------------------|---------|--------|--------|------|
| C K     | 84.72    | 84.72    | 96.64    | 5.02    | 367.33        | 1.83             | 0.7757  | 1.0544 | 0.9729 | 0.86 |
| O K     | 0.43     | 0.43     | 0.37     | 108.70  | 1.00          | 100.00           | 0.0014  | 0.9950 | 0.9920 | 0.32 |
| Cu L    | 0.52     | 0.52     | 0.11     | 41.16   | 1.92          | 38.26            | 0.0034  | 0.7080 | 1.1533 | 0.91 |
| Zn L    | 0.76     | 0.76     | 0.16     | 29.83   | 2.84          | 27.43            | 0.0052  | 0.7075 | 1.1581 | 0.96 |
| Na K    | 0.00     | 0.00     | 0.00     | 104.50  | 0.03          | 100.00           | 0.0000  | 0.8904 | 1.0138 | 0.75 |
| S K     | 1.02     | 1.02     | 0.43     | 24.31   | 4.77          | 21.75            | 0.0087  | 0.8573 | 1.0379 | 0.99 |
| K K     | 3.41     | 3.41     | 1.19     | 16.44   | 9.97          | 13.40            | 0.0279  | 0.8029 | 1.0449 | 1.00 |
| Ca K    | 0.44     | 0.44     | 0.15     | 83.35   | 0.99          | 80.09            | 0.0036  | 0.8139 | 1.0454 | 1.00 |
| I L     | 8.70     | 8.70     | 0.94     | 30.67   | 4.54          | 26.65            | 0.0497  | 0.5493 | 1.1568 | 1.04 |

# EDAX TEAM EDS

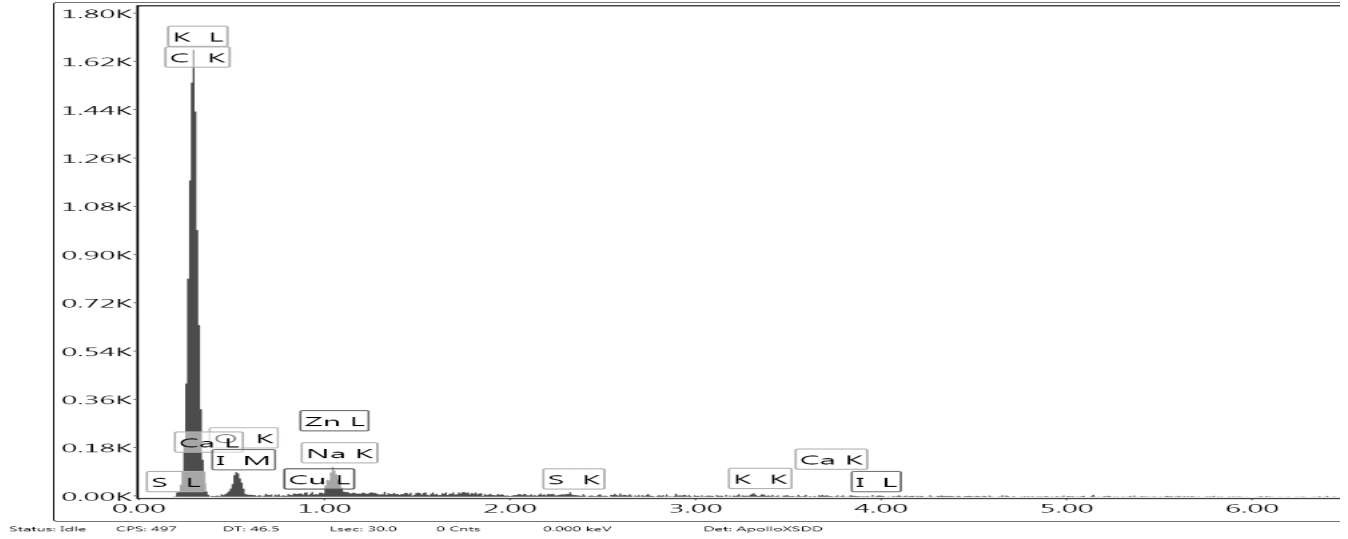

| Element | Weight % | Weight % | Atomic % | Error % | Net Intensity | Net Int. Error % | K Ratio | Z      | R      | A    |
|---------|----------|----------|----------|---------|---------------|------------------|---------|--------|--------|------|
| C K     | 88.27    | 88.27    | 92.44    | 4.71    | 254.81        | 1.78             | 0.7870  | 1.0133 | 0.9949 | 0.87 |
| O K     | 6.95     | 6.95     | 5.46     | 30.14   | 10.14         | 21.31            | 0.0196  | 0.9558 | 1.0118 | 0.29 |
| Cu L    | 0.04     | 0.04     | 0.01     | 102.29  | 0.10          | 100.00           | 0.0002  | 0.6836 | 1.1753 | 0.95 |
| Zn L    | 0.02     | 0.02     | 0.00     | 102.14  | 0.04          | 100.00           | 0.0001  | 0.6830 | 1.1798 | 1.02 |
| Na K    | 2.91     | 2.91     | 1.59     | 12.72   | 17.79         | 8.73             | 0.0196  | 0.8549 | 1.0311 | 0.78 |
| S K     | 0.42     | 0.42     | 0.17     | 71.13   | 1.48          | 68.87            | 0.0035  | 0.8228 | 1.0516 | 1.00 |
| K K     | 0.71     | 0.71     | 0.23     | 70.45   | 1.60          | 67.72            | 0.0055  | 0.7707 | 1.0572 | 1.01 |
| Ca K    | 0.17     | 0.17     | 0.05     | 102.92  | 0.31          | 100.00           | 0.0014  | 0.7816 | 1.0575 | 1.01 |
| I L     | 0.52     | 0.52     | 0.05     | 96.09   | 0.22          | 92.47            | 0.0029  | 0.5350 | 1.1831 | 1.05 |
