# Supplementary material for: Removal of hydrogen sulfide from a biogas mimic by using impregnated activated carbon adsorbent
Source: PubMed Central journal article supplement (PMC6372171; doi:10.1371/journal.pone.0211713), 2019-02-12
Supplement: pone.0211713.s003.pdf [file pone.0211713.s003.pdf]

Sample: 001-625-KI-CAC  
Operator: Jack  
Submitter: Am  
File: C:\2020\DATA\_INI\001-625.SMP

|                      |                         |               |                          |
|----------------------|-------------------------|---------------|--------------------------|
| Started:             | 25-011-17 6:27:49PM     | Analysis      |                          |
|                      |                         | Adsorptive:   | N2                       |
| Completed:           | 26-011-17 6:55:33AM     | Analysis Bath |                          |
|                      |                         | Temp.:        | -195.704 °C              |
| Report Time:         | 01-022-17 6:03:56PM     | Thermal       |                          |
|                      |                         | Correction:   | No                       |
| Sample Mass:         | 0.1910 g                | Warm Free     | 27.6671 cm <sup>3</sup>  |
|                      |                         | Space:        | Measured                 |
| Cold Free Space:     | 83.7949 cm <sup>3</sup> | Equilibration |                          |
|                      |                         | Interval:     | 10 s                     |
| Ambient Temperature: | 22.00 °C                | Low Pressure  | 5.000 cm <sup>3</sup> /g |
| Automatic Degas:     | Yes                     | Dose:         | STP                      |

## Summary Report

### Surface Area

Single point surface area at P/Po = 0.201845721: 748.2817 m<sup>2</sup>/g

BET Surface Area: 726.6914 m<sup>2</sup>/g

Langmuir Surface Area: 967.0150 m<sup>2</sup>/g

t-Plot Micropore Area: 574.8799 m<sup>2</sup>/g

t-Plot External Surface Area: 151.8115 m<sup>2</sup>/g

BJH Adsorption cumulative surface area of pores between 17.000 Å and 3000.000 Å width: 64.712 m<sup>2</sup>/g

BJH Desorption cumulative surface area of pores between 17.000 Å and 3000.000 Å width: 68.3421 m<sup>2</sup>/g

#### Pore Volume

Single point adsorption total pore volume of pores less than 1249.773 Å width at P/Po = 0.984263997: 0.349330 cm<sup>3</sup>/g

Single point desorption total pore volume of pores less than 730.795 Å width at P/Po = 0.972785932: 0.348985 cm<sup>3</sup>/g

t-Plot micropore volume: 0.266402 cm<sup>3</sup>/g

BJH Adsorption cumulative volume of pores between 17.000 Å and 3000.000 Å width: 0.047780 cm<sup>3</sup>/g

BJH Desorption cumulative volume of pores between 17.000 Å and 3000.000 Å width: 0.047319 cm<sup>3</sup>/g

#### Pore Size

Adsorption average pore width (4V/A by BET): 19.2285 Å

Desorption average pore width (4V/A by BET): 19.2095 Å

BJH Adsorption average pore width (4V/A): 29.534 Å

BJH Desorption average pore width (4V/A): 27.695 Å

Sample: 001-626- KOH-CAC  
Operator: Jack  
Submitter: Am  
File: C:\2020\DATA\_INI\001-626.SMP

|                      |                         |               |                              |
|----------------------|-------------------------|---------------|------------------------------|
| Started:             | 26-011-17 9:43:35AM     | Analysis      |                              |
|                      |                         | Adsorptive:   | N2                           |
| Completed:           | 27-011-17 12:33:09AM    | Analysis Bath |                              |
|                      |                         | Temp.:        | -195.683 °C                  |
| Report Time:         | 01-022-17 6:03:59PM     | Thermal       |                              |
|                      |                         | Correction:   | No                           |
| Sample Mass:         | 0.1761 g                | Warm Free     | 25.0765 cm <sup>3</sup>      |
|                      |                         | Space:        | Measured                     |
| Cold Free Space:     | 64.2053 cm <sup>3</sup> | Equilibration |                              |
|                      |                         | Interval:     | 10 s                         |
| Ambient Temperature: | 22.00 °C                | Low Pressure  |                              |
| Automatic Degas:     | Yes                     | Dose:         | 5.000 cm <sup>3</sup> /g STP |

## Summary Report

### Surface Area

Single point surface area at P/Po = 0.202600453: 825.8336 m<sup>2</sup>/g

BET Surface Area: 805.4541 m<sup>2</sup>/g

Langmuir Surface Area: 1073.5670 m<sup>2</sup>/g

t-Plot Micropore Area: 613.7734 m<sup>2</sup>/g

t-Plot External Surface Area: 191.6807 m<sup>2</sup>/g

BJH Adsorption cumulative surface area of pores between 17.000 Å and 3000.000 Å width: 68.476 m<sup>2</sup>/g

BJH Desorption cumulative surface area of pores between 17.000 Å and 3000.000 Å width: 82.3445 m<sup>2</sup>/g

#### Pore Volume

Single point adsorption total pore volume of pores less than 0.000 Å width at P/Po = 1.003623644: 0.367052 cm<sup>3</sup>/g

Single point desorption total pore volume of pores less than 631.082 Å width at P/Po = 0.968372929: 0.368099 cm<sup>3</sup>/g

t-Plot micropore volume: 0.283633 cm<sup>3</sup>/g

BJH Adsorption cumulative volume of pores between 17.000 Å and 3000.000 Å width: 0.039114 cm<sup>3</sup>/g

BJH Desorption cumulative volume of pores between 17.000 Å and 3000.000 Å width: 0.047337 cm<sup>3</sup>/g

#### Pore Size

Adsorption average pore width (4V/A by BET): 18.2283 Å

Desorption average pore width (4V/A by BET): 18.2803 Å

BJH Adsorption average pore width (4V/A): 22.848 Å

BJH Desorption average pore width (4V/A): 22.995 Å

Sample: 001-627-RAW CAC  
Operator: Jack  
Submitter: Am  
File: C:\2020\DATA\_INI\001-627.SMP

|                      |                         |               |                          |
|----------------------|-------------------------|---------------|--------------------------|
| Started:             | 27-011-17 4:31:56AM     | Analysis      |                          |
| Completed:           | 27-011-17 2:50:56PM     | Adsorptive:   | N2                       |
| Report Time:         | 01-022-17 6:04:03PM     | Analysis Bath |                          |
| Sample Mass:         | 0.0571 g                | Temp.:        | -195.696 °C              |
| Cold Free Space:     | 81.7763 cm <sup>3</sup> | Thermal       |                          |
| Ambient Temperature: | 22.00 °C                | Correction:   | No                       |
| Automatic Degas:     | Yes                     | Warm Free     | 27.5183 cm <sup>3</sup>  |
|                      |                         | Space:        | Measured                 |
|                      |                         | Equilibration |                          |
|                      |                         | Interval:     | 10 s                     |
|                      |                         | Low Pressure  | 5.000 cm <sup>3</sup> /g |
|                      |                         | Dose:         | STP                      |

## Summary Report

### Surface Area

Single point surface area at P/Po = 0.200817843: 923.5674 m<sup>2</sup>/g

BET Surface Area: 901.0417 m<sup>2</sup>/g

Langmuir Surface Area: 1196.0140 m<sup>2</sup>/g

t-Plot Micropore Area: 693.6494 m<sup>2</sup>/g

t-Plot External Surface Area: 207.3922 m<sup>2</sup>/g

BJH Adsorption cumulative surface area of pores between 17.000 Å and 3000.000 Å width: 87.437 m<sup>2</sup>/g

BJH Desorption cumulative surface area of pores between 17.000 Å and 3000.000 Å width: 103.4942 m<sup>2</sup>/g

#### Pore Volume

Single point adsorption total pore volume of pores less than 1283.897 Å width at P/Po = 0.984689712: 0.430543 cm<sup>3</sup>/g

Single point desorption total pore volume of pores less than 1096.822 Å width at P/Po = 0.982025460: 0.431053 cm<sup>3</sup>/g

t-Plot micropore volume: 0.319614 cm<sup>3</sup>/g

BJH Adsorption cumulative volume of pores between 17.000 Å and 3000.000 Å width: 0.063219 cm<sup>3</sup>/g

BJH Desorption cumulative volume of pores between 17.000 Å and 3000.000 Å width: 0.072732 cm<sup>3</sup>/g

#### Pore Size

Adsorption average pore width (4V/A by BET): 19.1131 Å

Desorption average pore width (4V/A by BET): 19.1358 Å

BJH Adsorption average pore width (4V/A): 28.921 Å

BJH Desorption average pore width (4V/A): 28.111 Å

Sample: 001-628- ZnAC<sub>2</sub>-CAC  
Operator: Jack  
Submitter: Am  
File: C:\2020\DATA\_INI\001-628.SMP

|                      |                         |               |                          |
|----------------------|-------------------------|---------------|--------------------------|
| Started:             | 30-011-17 9:40:52AM     | Analysis      |                          |
|                      |                         | Adsorptive:   | N2                       |
| Completed:           | 30-011-17 9:19:36PM     | Analysis Bath |                          |
|                      |                         | Temp.:        | -195.712 °C              |
| Report Time:         | 01-022-17 6:04:06PM     | Thermal       |                          |
|                      |                         | Correction:   | No                       |
| Sample Mass:         | 0.0687 g                | Warm Free     | 25.1026 cm <sup>3</sup>  |
|                      |                         | Space:        | Measured                 |
| Cold Free Space:     | 64.5609 cm <sup>3</sup> | Equilibration |                          |
|                      |                         | Interval:     | 10 s                     |
| Ambient Temperature: | 22.00 °C                | Low Pressure  | 5.000 cm <sup>3</sup> /g |
| Automatic Degas:     | Yes                     | Dose:         | STP                      |

## Summary Report

### Surface Area

Single point surface area at P/Po = 0.200893070: 672.1401 m<sup>2</sup>/g

BET Surface Area: 656.7483 m<sup>2</sup>/g

Langmuir Surface Area: 872.8989 m<sup>2</sup>/g

t-Plot Micropore Area: 500.5086 m<sup>2</sup>/g

t-Plot External Surface Area: 156.2397 m<sup>2</sup>/g

BJH Adsorption cumulative surface area of pores between 17.000 Å and 3000.000 Å width: 54.067 m<sup>2</sup>/g

BJH Desorption cumulative surface area of pores between 17.000 Å and 3000.000 Å width: 0.6153 m<sup>2</sup>/g

#### Pore Volume

Single point adsorption total pore volume of pores less than 1399.805 Å width at P/Po = 0.985978762: 0.294462 cm<sup>3</sup>/g

Single point desorption total pore volume of pores less than 903.160 Å width at P/Po = 0.978084395: 0.296155 cm<sup>3</sup>/g

t-Plot micropore volume: 0.230162 cm<sup>3</sup>/g

BJH Adsorption cumulative volume of pores between 17.000 Å and 3000.000 Å width: 0.041467 cm<sup>3</sup>/g

BJH Desorption cumulative volume of pores between 17.000 Å and 3000.000 Å width: 0.020279 cm<sup>3</sup>/g

#### Pore Size

Adsorption average pore width (4V/A by BET): 17.9345 Å

Desorption average pore width (4V/A by BET): 18.0377 Å

BJH Adsorption average pore width (4V/A): 30.678 Å

BJH Desorption average pore width (4V/A): 1318.213 Å



Sample: 001-629-CuSO<sub>4</sub>-CAC  
Operator: Jack  
Submitter: Am  
File: C:\2020\DATA\_INI\001-629.SMP

|                      |                         |               |                          |
|----------------------|-------------------------|---------------|--------------------------|
| Started:             | 30-011-17 10:06:25PM    | Analysis      |                          |
|                      |                         | Adsorptive:   | N2                       |
| Completed:           | 31-011-17 10:40:13AM    | Analysis Bath |                          |
|                      |                         | Temp.:        | -195.712 °C              |
| Report Time:         | 01-022-17 6:04:09PM     | Thermal       |                          |
|                      |                         | Correction:   | No                       |
| Sample Mass:         | 0.0404 g                | Warm Free     | 27.7241 cm <sup>3</sup>  |
|                      |                         | Space:        | Measured                 |
| Cold Free Space:     | 79.0580 cm <sup>3</sup> | Equilibration |                          |
|                      |                         | Interval:     | 10 s                     |
| Ambient Temperature: | 22.00 °C                | Low Pressure  | 5.000 cm <sup>3</sup> /g |
| Automatic Degas:     | Yes                     | Dose:         | STP                      |

## Summary Report

### Surface Area

Single point surface area at P/Po = 0.300693605: 839.0978 m<sup>2</sup>/g

BET Surface Area: 39.7642 m<sup>2</sup>/g

Langmuir Surface Area: 1211.7604 m<sup>2</sup>/g

t-Plot External Surface Area: 208.0819 m<sup>2</sup>/g

BJH Adsorption cumulative surface area of pores between 17.000 Å and 3000.000 Å width: 140.709 m<sup>2</sup>/g

## Pore Volume

Single point adsorption total pore volume of pores less than 3873.040 Å width at P/Po = 0.995000000: 0.433569 cm<sup>3</sup>/g

Single point desorption total pore volume of pores less than 3873.040 Å width at P/Po = 0.995000000: 0.433569 cm<sup>3</sup>/g

t-Plot micropore volume: 0.329269 cm<sup>3</sup>/g

BJH Adsorption cumulative volume of pores between 17.000 Å and 3000.000 Å width: 0.075049 cm<sup>3</sup>/g

## Pore Size

Adsorption average pore width (4V/A by BET): 436.1405 Å

Desorption average pore width (4V/A by BET): 436.1405 Å

BJH Adsorption average pore width (4V/A): 21.335 Å

## DFT Pore Size

|                       |    |          |   |                            |
|-----------------------|----|----------|---|----------------------------|
| Volume in Pores       | <  | 14.83 Å  | : | 0.25456 cm <sup>3</sup> /g |
| Total Volume in Pores | <= | 147.61 Å | : | 0.60436 cm <sup>3</sup> /g |
| Area in Pores         | >  | 147.61 Å | : | 0.000 m <sup>2</sup> /g    |
| Total Area in Pores   | >= | 14.83 Å  | : | 109.307 m <sup>2</sup> /g  |

## DFT Surface Energy

Total Area : 1274.233 m<sup>2</sup>/g

## Horvath-Kawazoe

Maximum pore volume at P/Po = 0.551530618: 0.429742 cm<sup>3</sup>/g

Sample: 001-630-Na<sub>2</sub>CO<sub>3</sub>-CAC  
Operator: Jack  
Submitter: Am  
File: C:\2020\DATA\_INI\001-630.SMP

|                      |                         |               |                          |
|----------------------|-------------------------|---------------|--------------------------|
| Started:             | 31-011-17 11:05:19AM    | Analysis      |                          |
|                      |                         | Adsorptive:   | N2                       |
| Completed:           | 31-011-17 10:28:05PM    | Analysis Bath |                          |
|                      |                         | Temp.:        | -195.729 °C              |
| Report Time:         | 01-022-17 6:04:12PM     | Thermal       |                          |
|                      |                         | Correction:   | No                       |
| Sample Mass:         | 0.0941 g                | Warm Free     | 25.2006 cm <sup>3</sup>  |
|                      |                         | Space:        | Measured                 |
| Cold Free Space:     | 73.6520 cm <sup>3</sup> | Equilibration |                          |
|                      |                         | Interval:     | 10 s                     |
| Ambient Temperature: | 22.00 °C                | Low Pressure  | 5.000 cm <sup>3</sup> /g |
| Automatic Degas:     | Yes                     | Dose:         | STP                      |

## Summary Report

### Surface Area

|                                                  |                             |
|--------------------------------------------------|-----------------------------|
| Single point surface area at P/Po = 0.201216119: | 918.6860 m <sup>2</sup> /g  |
| BET Surface Area:                                | 901.5779 m <sup>2</sup> /g  |
| Langmuir Surface Area:                           | 1195.6562 m <sup>2</sup> /g |
| t-Plot Micropore Area:                           | 666.1636 m <sup>2</sup> /g  |
| t-Plot External Surface Area:                    | 235.4143 m <sup>2</sup> /g  |

BJH Adsorption cumulative surface area of pores between 17.000 Å and 3000.000 Å width: 94.463 m<sup>2</sup>/g

BJH Desorption cumulative surface area of pores between 17.000 Å and 3000.000 Å width: 100.9962 m<sup>2</sup>/g

#### Pore Volume

Single point adsorption total pore volume of pores less than 1273.238 Å width at P/Po = 0.984559216: 0.428111 cm<sup>3</sup>/g

Single point desorption total pore volume of pores less than 789.692 Å width at P/Po = 0.974860916: 0.427786 cm<sup>3</sup>/g

t-Plot micropore volume: 0.305281 cm<sup>3</sup>/g

BJH Adsorption cumulative volume of pores between 17.000 Å and 3000.000 Å width: 0.064933 cm<sup>3</sup>/g

BJH Desorption cumulative volume of pores between 17.000 Å and 3000.000 Å width: 0.066433 cm<sup>3</sup>/g

#### Pore Size

Adsorption average pore width (4V/A by BET): 18.9939 Å

Desorption average pore width (4V/A by BET): 18.9794 Å

BJH Adsorption average pore width (4V/A): 27.496 Å

BJH Desorption average pore width (4V/A): 26.311 Å
