# Supplementary material for: Removal of hydrogen sulfide from a biogas mimic by using impregnated activated carbon adsorbent
Source: PubMed Central journal article supplement (PMC6372171; doi:10.1371/journal.pone.0211713), 2019-02-12
Supplement: pone.0211713.s004.pdf [file pone.0211713.s004.pdf]

# Raw Commercial Activated Carbon (coconut)

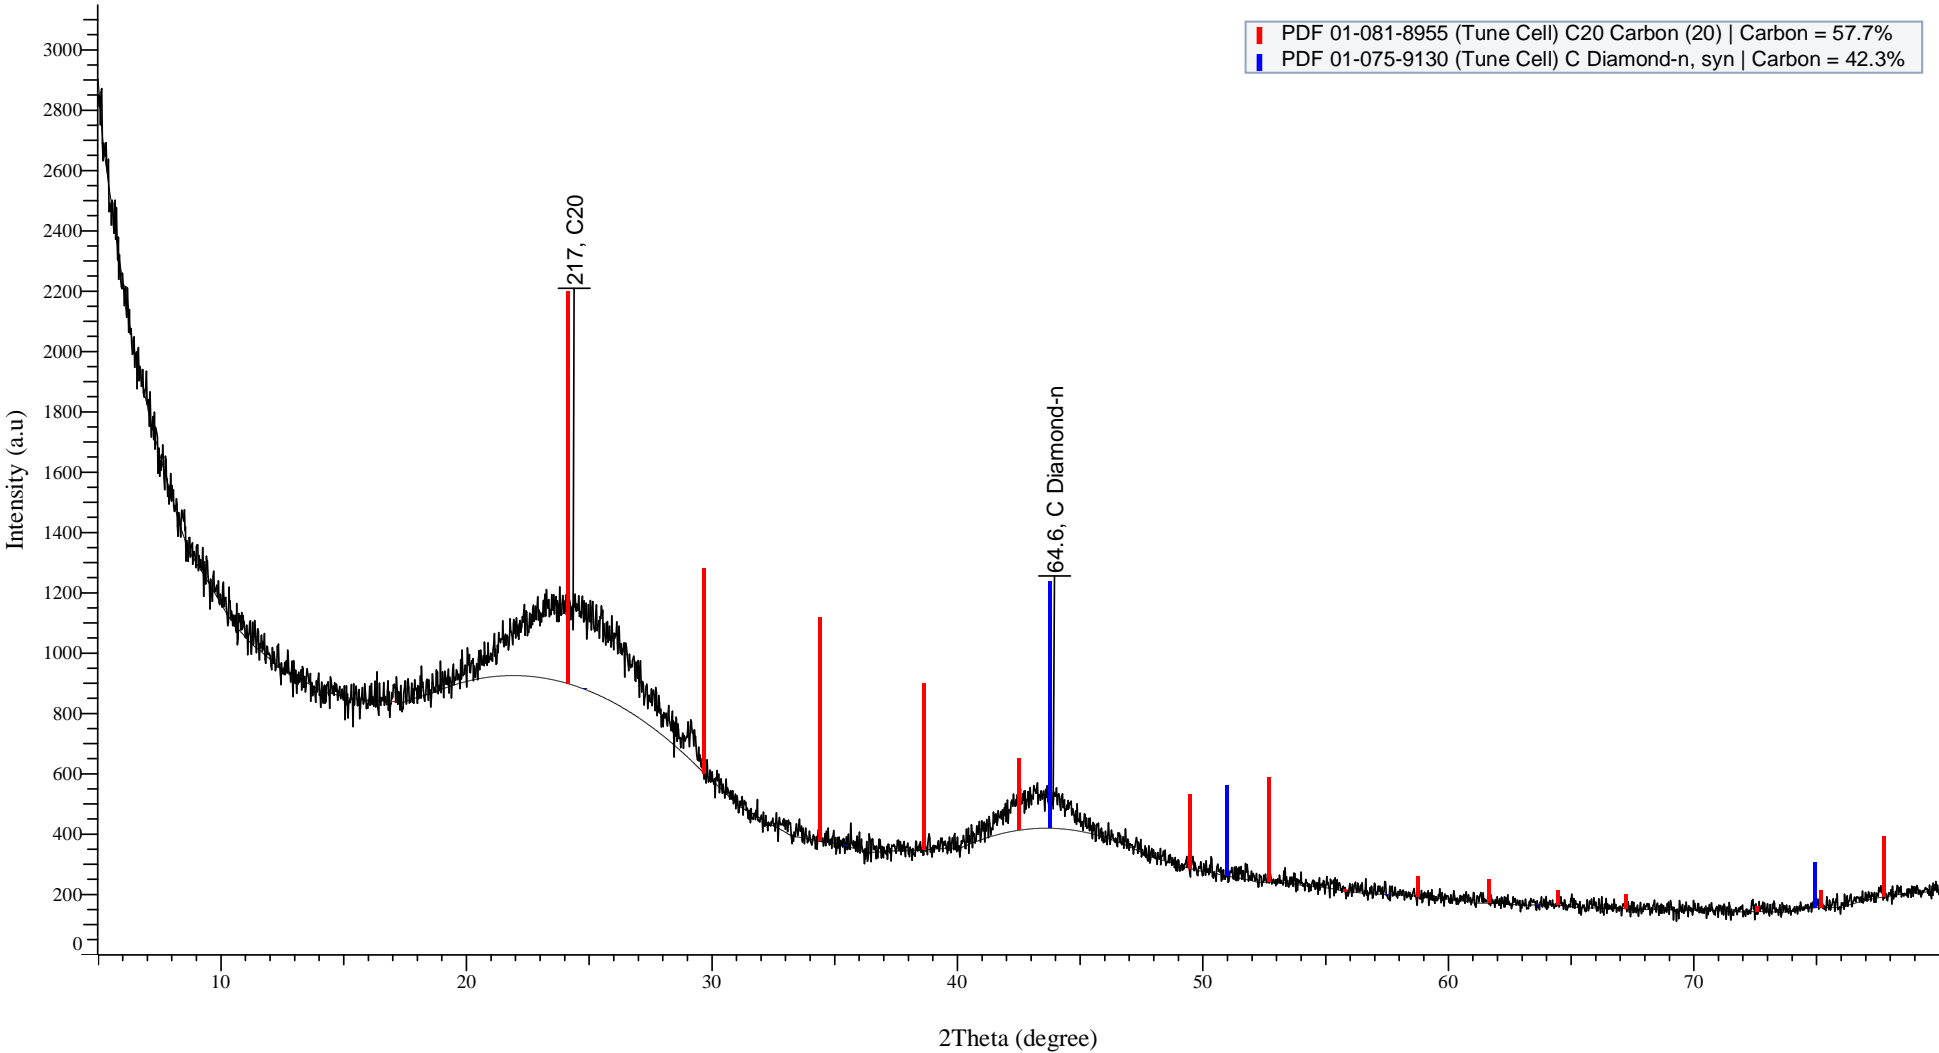

## Raw CAC Overall Data

|                                    |                                                                                     |
|------------------------------------|-------------------------------------------------------------------------------------|
| <b>Visible</b>                     | Yes                                                                                 |
| <b>Icon</b>                        |  |
| <b>Color</b>                       |  |
| <b>Index</b>                       | 1                                                                                   |
| <b>Name</b>                        | Raw CAC.raw                                                                         |
| <b>Parent</b>                      | 2Theta                                                                              |
| <b>Sample Name</b>                 | Raw CAC                                                                             |
| <b>Scan's Sample Name</b>          |                                                                                     |
| <b>File Name</b>                   | Raw CAC.raw                                                                         |
| <b>Experiment File Name</b>        |                                                                                     |
| <b>Database ID</b>                 |                                                                                     |
| <b>Scan Type</b>                   | Coupled TwoTheta/Theta                                                              |
| <b>Scan Mode</b>                   | Continuousscan                                                                      |
| <b>Scan Status</b>                 | Completed                                                                           |
| <b>Start</b>                       | 5.000                                                                               |
| <b>End</b>                         | 79.986                                                                              |
| <b>Step Size</b>                   | 0.025                                                                               |
| <b>Time per Step</b>               | 19.00                                                                               |
| <b>Axis Offset</b>                 |                                                                                     |
| <b>Temperature</b>                 | 25 °C (Room)                                                                        |
| <b>Temp. Diff.</b>                 |                                                                                     |
| <b>Heating Rate</b>                |                                                                                     |
| <b>Time Started</b>                | 15.0                                                                                |
| <b>Goniometer Radius</b>           | 217.5                                                                               |
| <b>Goniometer Radius Primary</b>   |                                                                                     |
| <b>Goniometer Radius Secondary</b> |                                                                                     |
| <b>2-theta</b>                     | 5.000                                                                               |
| <b>2-theta Osc. Amplitude</b>      | 0.000                                                                               |
| <b>2-theta Osc. Speed</b>          | 0.000                                                                               |
| <b>Theta</b>                       | 2.500                                                                               |
| <b>Theta Osc. Amplitude</b>        | 0.000                                                                               |
| <b>Theta Osc. Speed</b>            | 0.000                                                                               |
| <b>Detector</b>                    |                                                                                     |
| <b>Detector Osc. Amplitude</b>     |                                                                                     |
| <b>Detector Osc. Speed</b>         |                                                                                     |
| <b>Chi</b>                         | 0.00                                                                                |
| <b>Chi Osc. Amplitude</b>          | 0.00                                                                                |
| <b>Chi Osc. Speed</b>              | 0.00                                                                                |
| <b>Phi</b>                         | 0.00                                                                                |
| <b>Phi Osc. Amplitude</b>          | 0.00                                                                                |

|                                     |         |
|-------------------------------------|---------|
| <b>Phi Osc. Speed</b>               | 0.00    |
| <b>Gamma</b>                        | 0.00    |
| <b>X-Drive</b>                      | 0.0     |
| <b>X-drive Osc. Amplitude</b>       | 0.0     |
| <b>X-drive Osc. Speed</b>           | 0.0     |
| <b>Y-Drive</b>                      | 0.0     |
| <b>Y-drive Osc. Amplitude</b>       | 0.0     |
| <b>Y-drive Osc. Speed</b>           | 0.0     |
| <b>Z-Drive</b>                      | 0.0     |
| <b>Z-drive Osc. Amplitude</b>       | 0.0     |
| <b>Z-drive Osc. Speed</b>           | 0.0     |
| <b>Aux1</b>                         | 0.0     |
| <b>Aux2</b>                         | 0.0     |
| <b>Aux3</b>                         | 0.0     |
| <b>Anode</b>                        | Cu      |
| <b><math>k\alpha 1</math></b>       | 1.54060 |
| <b><math>k\alpha 2</math></b>       | 1.54439 |
| <b><math>k\alpha 2</math> Ratio</b> | 0.50000 |
| <b><math>k\beta</math></b>          | 1.39222 |
| <b>Generator kV</b>                 | 40.0    |
| <b>Generator mA</b>                 | 40.0    |
| <b>Detector Name</b>                | Braun   |
| <b>Calcium Channel</b>              |         |
| <b>Calcium Channel Time</b>         |         |
| <b>LynxEye 0D</b>                   | No      |
| <b>PSD Opening</b>                  |         |
| <b>PSD Opening Initial</b>          |         |
| <b>2Theta For Final PSD Opening</b> |         |
| <b>Detector Slit Opening</b>        | 12.930  |
| <b>Lower Discriminator</b>          |         |
| <b>Upper Discriminator</b>          |         |
| <b>Discriminator Width</b>          |         |
| <b>Detector Counts 0D</b>           |         |
| <b>Primary Soller slit</b>          | 4.000   |
| <b>Secondary Soller slit</b>        | 4.000   |
| <b>Center Soller slit</b>           |         |
| <b>Sample rotation speed</b>        |         |
| <b>Divergence Slit</b>              | 0.298   |
| <b>Antiscatter Slit</b>             | 0.298   |
| <b>Slit Mode</b>                    | Fixed   |
| <b>Simul. Slit Mode</b>             |         |
| <b>Center Slit</b>                  |         |

|                                   |                     |
|-----------------------------------|---------------------|
| <b>X-Offset</b>                   | 0.000               |
| <b>Displacement</b>               | 0.000               |
| <b>Y-Scale Factor</b>             | 1                   |
| <b>Y-Offset</b>                   | 0                   |
| <b>Humidity</b>                   | n.a.                |
| <b>Curvature</b>                  | 1.000               |
| <b>Threshold</b>                  | 1.000               |
| <b>Enhanced</b>                   | No                  |
| <b>BackgroundFit</b>              | No                  |
| <b>BackgroundOrder</b>            | 0.000               |
| <b>BackgroundHyperbola</b>        | No                  |
| <b>Compute Crystallinity</b>      | Yes                 |
| <b>Cristallinity - From</b>       | 5.000               |
| <b>Cristallinity - To</b>         | 79.986              |
| <b>%-Crystallinity</b>            | 37.8%               |
| <b>%-Amorphous</b>                | 62.2%               |
| <b>Global Area</b>                | 324.4               |
| <b>Reduced Area</b>               | 122.8               |
| <b>Transmission without Blank</b> |                     |
| <b>Transmission</b>               |                     |
| <b>Company Name</b>               | Malaysia            |
| <b>Operator Name</b>              | Administrator       |
| <b>User Comment</b>               |                     |
| <b>Sample Position</b>            |                     |
| <b>Creation Date/Time</b>         | 4/1/2017 3:40:41 PM |
| <b>Last Write Date/Time</b>       | 4/1/2017 3:40:41 PM |
| <b>Measurement Duration</b>       | 00:00:00            |
| <b>Set index</b>                  | Not used            |

### Raw CAtC Compute Crystallinity

|                        |         |
|------------------------|---------|
| <b>Index</b>           | 1       |
| <b>Sample Name</b>     | Raw CAC |
| <b>%-Crystallinity</b> | 37.8%   |
| <b>%-Amorphous</b>     | 62.2%   |
| <b>Global Area</b>     | 324.4   |
| <b>Reduced Area</b>    | 122.8   |

# Modified Na<sub>2</sub>CO<sub>3</sub> - CAC

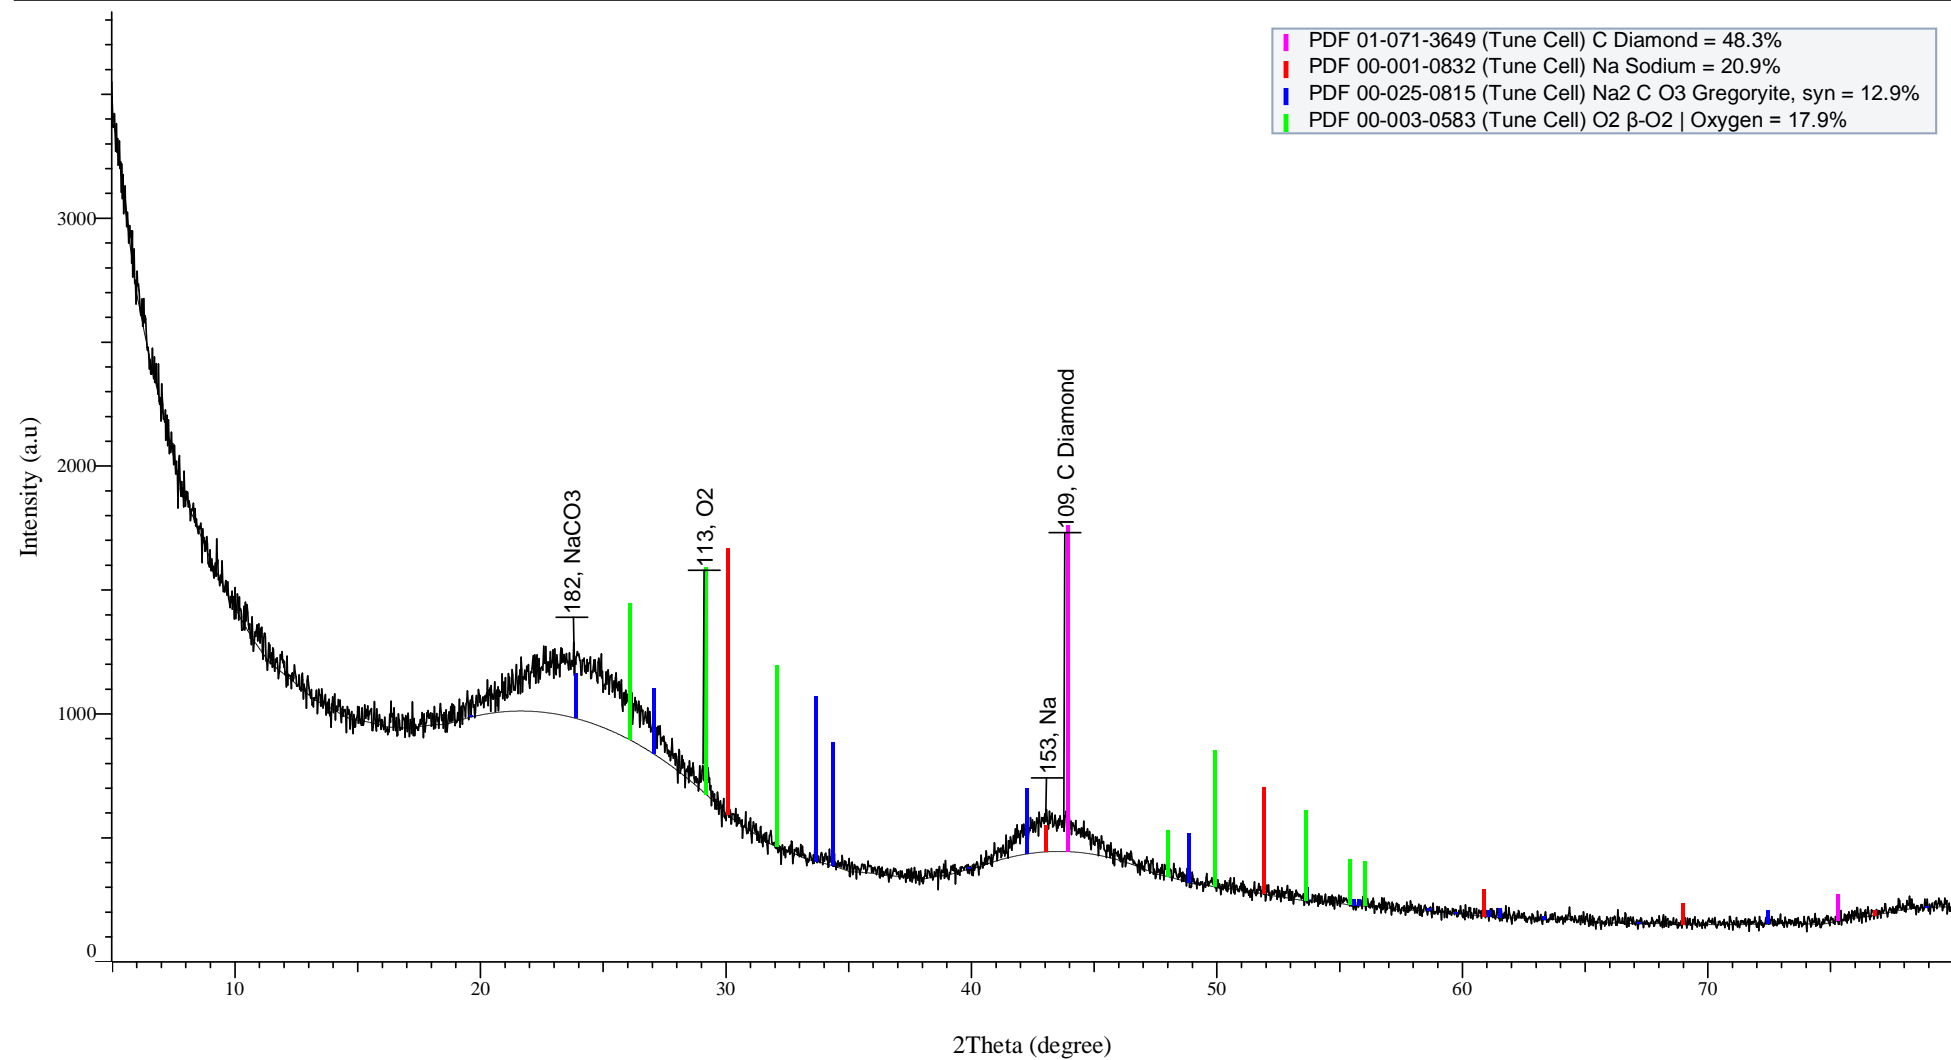

## Na<sub>2</sub>CO<sub>3</sub>-CAC Overall Data

|                                    |                                                                                     |
|------------------------------------|-------------------------------------------------------------------------------------|
| <b>Visible</b>                     | Yes                                                                                 |
| <b>Icon</b>                        |  |
| <b>Color</b>                       |  |
| <b>Index</b>                       | 1                                                                                   |
| <b>Name</b>                        | CAC-Na <sub>2</sub> CO <sub>3</sub> .raw                                            |
| <b>Parent</b>                      | 2Theta                                                                              |
| <b>Sample Name</b>                 | CAC-Na <sub>2</sub> CO <sub>3</sub>                                                 |
| <b>Scan's Sample Name</b>          |                                                                                     |
| <b>File Name</b>                   | CAC-Na <sub>2</sub> CO <sub>3</sub> .raw                                            |
| <b>Experiment File Name</b>        |                                                                                     |
| <b>Database ID</b>                 |                                                                                     |
| <b>Scan Type</b>                   | Coupled TwoTheta/Theta                                                              |
| <b>Scan Mode</b>                   | Continuousscan                                                                      |
| <b>Scan Status</b>                 | Completed                                                                           |
| <b>Start</b>                       | 5.000                                                                               |
| <b>End</b>                         | 79.986                                                                              |
| <b>Step Size</b>                   | 0.025                                                                               |
| <b>Time per Step</b>               | 19.00                                                                               |
| <b>Axis Offset</b>                 |                                                                                     |
| <b>Temperature</b>                 | 25 °C (Room)                                                                        |
| <b>Temp. Diff.</b>                 |                                                                                     |
| <b>Heating Rate</b>                |                                                                                     |
| <b>Time Started</b>                | 17.0                                                                                |
| <b>Goniometer Radius</b>           | 217.5                                                                               |
| <b>Goniometer Radius Primary</b>   |                                                                                     |
| <b>Goniometer Radius Secondary</b> |                                                                                     |
| <b>2-theta</b>                     | 5.000                                                                               |
| <b>2-theta Osc. Amplitude</b>      | 0.000                                                                               |
| <b>2-theta Osc. Speed</b>          | 0.000                                                                               |
| <b>Theta</b>                       | 2.500                                                                               |
| <b>Theta Osc. Amplitude</b>        | 0.000                                                                               |
| <b>Theta Osc. Speed</b>            | 0.000                                                                               |
| <b>Detector</b>                    |                                                                                     |
| <b>Detector Osc. Amplitude</b>     |                                                                                     |
| <b>Detector Osc. Speed</b>         |                                                                                     |
| <b>Chi</b>                         | 0.00                                                                                |
| <b>Chi Osc. Amplitude</b>          | 0.00                                                                                |
| <b>Chi Osc. Speed</b>              | 0.00                                                                                |
| <b>Phi</b>                         | 0.00                                                                                |
| <b>Phi Osc. Amplitude</b>          | 0.00                                                                                |

|                                     |         |
|-------------------------------------|---------|
| <b>Phi Osc. Speed</b>               | 0.00    |
| <b>Gamma</b>                        | 0.00    |
| <b>X-Drive</b>                      | 0.0     |
| <b>X-drive Osc. Amplitude</b>       | 0.0     |
| <b>X-drive Osc. Speed</b>           | 0.0     |
| <b>Y-Drive</b>                      | 0.0     |
| <b>Y-drive Osc. Amplitude</b>       | 0.0     |
| <b>Y-drive Osc. Speed</b>           | 0.0     |
| <b>Z-Drive</b>                      | 0.0     |
| <b>Z-drive Osc. Amplitude</b>       | 0.0     |
| <b>Z-drive Osc. Speed</b>           | 0.0     |
| <b>Aux1</b>                         | 0.0     |
| <b>Aux2</b>                         | 0.0     |
| <b>Aux3</b>                         | 0.0     |
| <b>Anode</b>                        | Cu      |
| <b><math>k\alpha 1</math></b>       | 1.54060 |
| <b><math>k\alpha 2</math></b>       | 1.54439 |
| <b><math>k\alpha 2</math> Ratio</b> | 0.50000 |
| <b><math>k\beta</math></b>          | 1.39222 |
| <b>Generator kV</b>                 | 40.0    |
| <b>Generator mA</b>                 | 40.0    |
| <b>Detector Name</b>                | Braun   |
| <b>Calcium Channel</b>              |         |
| <b>Calcium Channel Time</b>         |         |
| <b>LynxEye 0D</b>                   | No      |
| <b>PSD Opening</b>                  |         |
| <b>PSD Opening Initial</b>          |         |
| <b>2Theta For Final PSD Opening</b> |         |
| <b>Detector Slit Opening</b>        | 12.930  |
| <b>Lower Discriminator</b>          |         |
| <b>Upper Discriminator</b>          |         |
| <b>Discriminator Width</b>          |         |
| <b>Detector Counts 0D</b>           |         |
| <b>Primary Soller slit</b>          | 4.000   |
| <b>Secondary Soller slit</b>        | 4.000   |
| <b>Center Soller slit</b>           |         |
| <b>Sample rotation speed</b>        |         |
| <b>Divergence Slit</b>              | 0.298   |
| <b>Antiscatter Slit</b>             | 0.298   |
| <b>Slit Mode</b>                    | Fixed   |
| <b>Simul. Slit Mode</b>             |         |
| <b>Center Slit</b>                  |         |



|                                   |                     |
|-----------------------------------|---------------------|
| <b>X-Offset</b>                   | 0.000               |
| <b>Displacement</b>               | 0.000               |
| <b>Y-Scale Factor</b>             | 1                   |
| <b>Y-Offset</b>                   | 0                   |
| <b>Humidity</b>                   | n.a.                |
| <b>Curvature</b>                  | 1.000               |
| <b>Threshold</b>                  | 1.000               |
| <b>Enhanced</b>                   | No                  |
| <b>BackgroundFit</b>              | No                  |
| <b>BackgroundOrder</b>            | 0.000               |
| <b>BackgroundHyperbola</b>        | No                  |
| <b>Compute Crystallinity</b>      | Yes                 |
| <b>Cristallinity - From</b>       | 5.000               |
| <b>Cristallinity - To</b>         | 79.986              |
| <b>%-Crystallinity</b>            | 37.0%               |
| <b>%-Amorphous</b>                | 63.0%               |
| <b>Global Area</b>                | 331.5               |
| <b>Reduced Area</b>               | 122.8               |
| <b>Transmission without Blank</b> |                     |
| <b>Transmission</b>               |                     |
| <b>Company Name</b>               | Malaysia            |
| <b>Operator Name</b>              | Administrator       |
| <b>User Comment</b>               |                     |
| <b>Sample Position</b>            |                     |
| <b>Creation Date/Time</b>         | 4/1/2017 3:35:01 PM |
| <b>Last Write Date/Time</b>       | 4/1/2017 3:35:01 PM |
| <b>Measurement Duration</b>       | 00:00:00            |
| <b>Set index</b>                  | Not used            |

## Na<sub>2</sub>CO<sub>3</sub>- CAC Compute Crystallinity

|                        |                                     |
|------------------------|-------------------------------------|
| <b>Index</b>           | 1                                   |
| <b>Sample Name</b>     | CAC-Na <sub>2</sub> CO <sub>3</sub> |
| <b>%-Crystallinity</b> | 37.0%                               |
| <b>%-Amorphous</b>     | 63.0%                               |
| <b>Global Area</b>     | 331.5                               |
| <b>Reduced Area</b>    | 122.8                               |

# Modified ZnAc2 - CAC

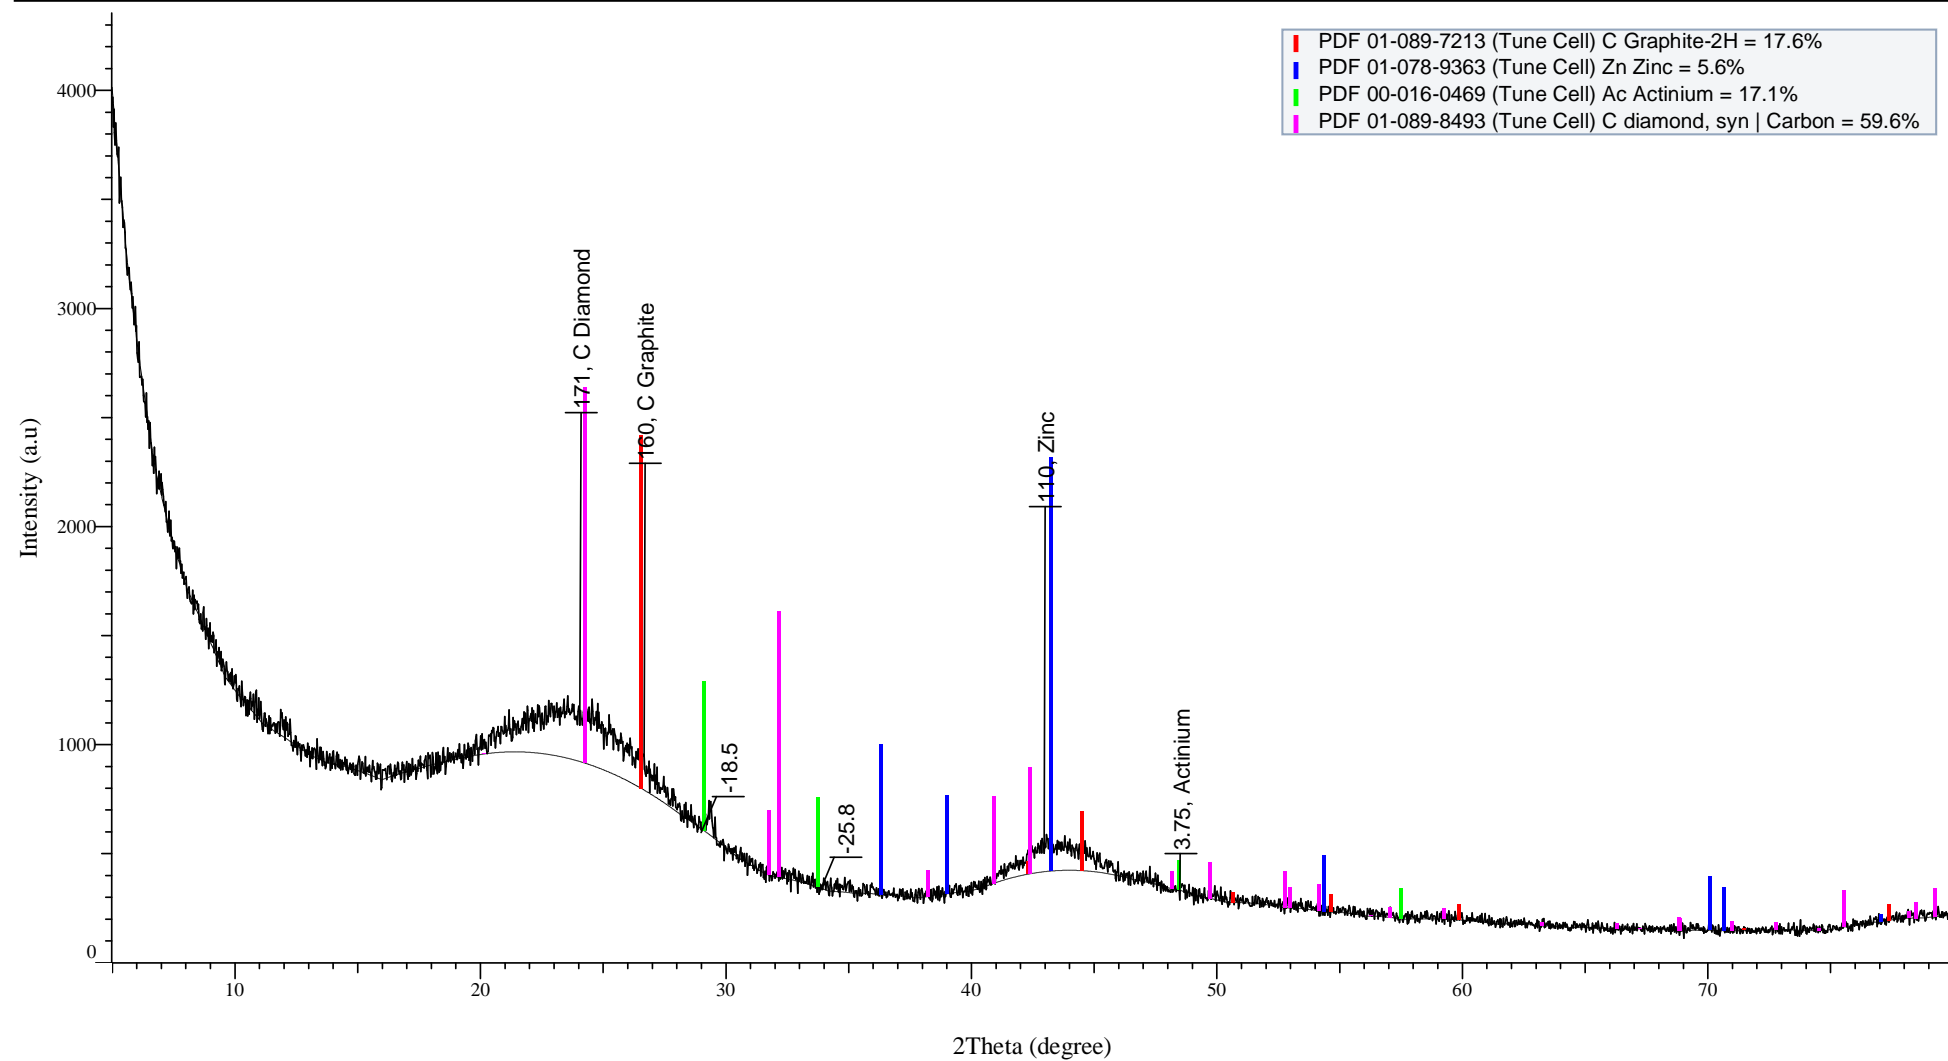

## ZnAc2 - CAC Overall Data

|                                    |                                                                                     |
|------------------------------------|-------------------------------------------------------------------------------------|
| <b>Visible</b>                     | Yes                                                                                 |
| <b>Icon</b>                        |  |
| <b>Color</b>                       |  |
| <b>Index</b>                       | 1                                                                                   |
| <b>Name</b>                        | CAC- ZnAC2.raw                                                                      |
| <b>Parent</b>                      | 2Theta                                                                              |
| <b>Sample Name</b>                 | CAC- ZnAC2                                                                          |
| <b>Scan's Sample Name</b>          |                                                                                     |
| <b>File Name</b>                   | CAC- ZnAC2.raw                                                                      |
| <b>Experiment File Name</b>        |                                                                                     |
| <b>Database ID</b>                 |                                                                                     |
| <b>Scan Type</b>                   | Coupled TwoTheta/Theta                                                              |
| <b>Scan Mode</b>                   | Continuousscan                                                                      |
| <b>Scan Status</b>                 | Completed                                                                           |
| <b>Start</b>                       | 5.000                                                                               |
| <b>End</b>                         | 79.986                                                                              |
| <b>Step Size</b>                   | 0.025                                                                               |
| <b>Time per Step</b>               | 19.00                                                                               |
| <b>Axis Offset</b>                 |                                                                                     |
| <b>Temperature</b>                 | 25 °C (Room)                                                                        |
| <b>Temp. Diff.</b>                 |                                                                                     |
| <b>Heating Rate</b>                |                                                                                     |
| <b>Time Started</b>                | 15.0                                                                                |
| <b>Goniometer Radius</b>           | 217.5                                                                               |
| <b>Goniometer Radius Primary</b>   |                                                                                     |
| <b>Goniometer Radius Secondary</b> |                                                                                     |
| <b>2-theta</b>                     | 5.000                                                                               |
| <b>2-theta Osc. Amplitude</b>      | 0.000                                                                               |
| <b>2-theta Osc. Speed</b>          | 0.000                                                                               |
| <b>Theta</b>                       | 2.500                                                                               |
| <b>Theta Osc. Amplitude</b>        | 0.000                                                                               |
| <b>Theta Osc. Speed</b>            | 0.000                                                                               |
| <b>Detector</b>                    |                                                                                     |
| <b>Detector Osc. Amplitude</b>     |                                                                                     |
| <b>Detector Osc. Speed</b>         |                                                                                     |
| <b>Chi</b>                         | 0.00                                                                                |
| <b>Chi Osc. Amplitude</b>          | 0.00                                                                                |
| <b>Chi Osc. Speed</b>              | 0.00                                                                                |
| <b>Phi</b>                         | 0.00                                                                                |
| <b>Phi Osc. Amplitude</b>          | 0.00                                                                                |

|                                     |         |
|-------------------------------------|---------|
| <b>Phi Osc. Speed</b>               | 0.00    |
| <b>Gamma</b>                        | 0.00    |
| <b>X-Drive</b>                      | 0.0     |
| <b>X-drive Osc. Amplitude</b>       | 0.0     |
| <b>X-drive Osc. Speed</b>           | 0.0     |
| <b>Y-Drive</b>                      | 0.0     |
| <b>Y-drive Osc. Amplitude</b>       | 0.0     |
| <b>Y-drive Osc. Speed</b>           | 0.0     |
| <b>Z-Drive</b>                      | 0.0     |
| <b>Z-drive Osc. Amplitude</b>       | 0.0     |
| <b>Z-drive Osc. Speed</b>           | 0.0     |
| <b>Aux1</b>                         | 0.0     |
| <b>Aux2</b>                         | 0.0     |
| <b>Aux3</b>                         | 0.0     |
| <b>Anode</b>                        | Cu      |
| <b><math>k\alpha 1</math></b>       | 1.54060 |
| <b><math>k\alpha 2</math></b>       | 1.54439 |
| <b><math>k\alpha 2</math> Ratio</b> | 0.50000 |
| <b><math>k\beta</math></b>          | 1.39222 |
| <b>Generator kV</b>                 | 40.0    |
| <b>Generator mA</b>                 | 40.0    |
| <b>Detector Name</b>                | Braun   |
| <b>Calcium Channel</b>              |         |
| <b>Calcium Channel Time</b>         |         |
| <b>LynxEye 0D</b>                   | No      |
| <b>PSD Opening</b>                  |         |
| <b>PSD Opening Initial</b>          |         |
| <b>2Theta For Final PSD Opening</b> |         |
| <b>Detector Slit Opening</b>        | 12.930  |
| <b>Lower Discriminator</b>          |         |
| <b>Upper Discriminator</b>          |         |
| <b>Discriminator Width</b>          |         |
| <b>Detector Counts 0D</b>           |         |
| <b>Primary Soller slit</b>          | 4.000   |
| <b>Secondary Soller slit</b>        | 4.000   |
| <b>Center Soller slit</b>           |         |
| <b>Sample rotation speed</b>        |         |
| <b>Divergence Slit</b>              | 0.298   |
| <b>Antiscatter Slit</b>             | 0.298   |
| <b>Slit Mode</b>                    | Fixed   |
| <b>Simul. Slit Mode</b>             |         |
| <b>Center Slit</b>                  |         |

|                                   |                     |
|-----------------------------------|---------------------|
| <b>X-Offset</b>                   | 0.000               |
| <b>Displacement</b>               | 0.000               |
| <b>Y-Scale Factor</b>             | 1                   |
| <b>Y-Offset</b>                   | 0                   |
| <b>Humidity</b>                   | n.a.                |
| <b>Curvature</b>                  | 1.000               |
| <b>Threshold</b>                  | 1.000               |
| <b>Enhanced</b>                   | No                  |
| <b>BackgroundFit</b>              | No                  |
| <b>BackgroundOrder</b>            | 0.000               |
| <b>BackgroundHyperbola</b>        | No                  |
| <b>Compute Crystallinity</b>      | Yes                 |
| <b>Cristallinity - From</b>       | 5.000               |
| <b>Cristallinity - To</b>         | 79.986              |
| <b>%-Crystallinity</b>            | 31.7%               |
| <b>%-Amorphous</b>                | 68.3%               |
| <b>Global Area</b>                | 343.0               |
| <b>Reduced Area</b>               | 108.6               |
| <b>Transmission without Blank</b> |                     |
| <b>Transmission</b>               |                     |
| <b>Company Name</b>               | Malaysia            |
| <b>Operator Name</b>              | Administrator       |
| <b>User Comment</b>               |                     |
| <b>Sample Position</b>            |                     |
| <b>Creation Date/Time</b>         | 4/1/2017 3:52:01 PM |
| <b>Last Write Date/Time</b>       | 4/1/2017 3:52:01 PM |
| <b>Measurement Duration</b>       | 00:00:00            |
| <b>Set index</b>                  | Not used            |

## ZnAc2 - CAC Compute Crystallinity

|                        |            |
|------------------------|------------|
| <b>Index</b>           | 1          |
| <b>Sample Name</b>     | CAC- ZnAC2 |
| <b>%-Crystallinity</b> | 31.7%      |
| <b>%-Amorphous</b>     | 68.3%      |
| <b>Global Area</b>     | 343.0      |
| <b>Reduced Area</b>    | 108.6      |

# Modified KOH - CAC

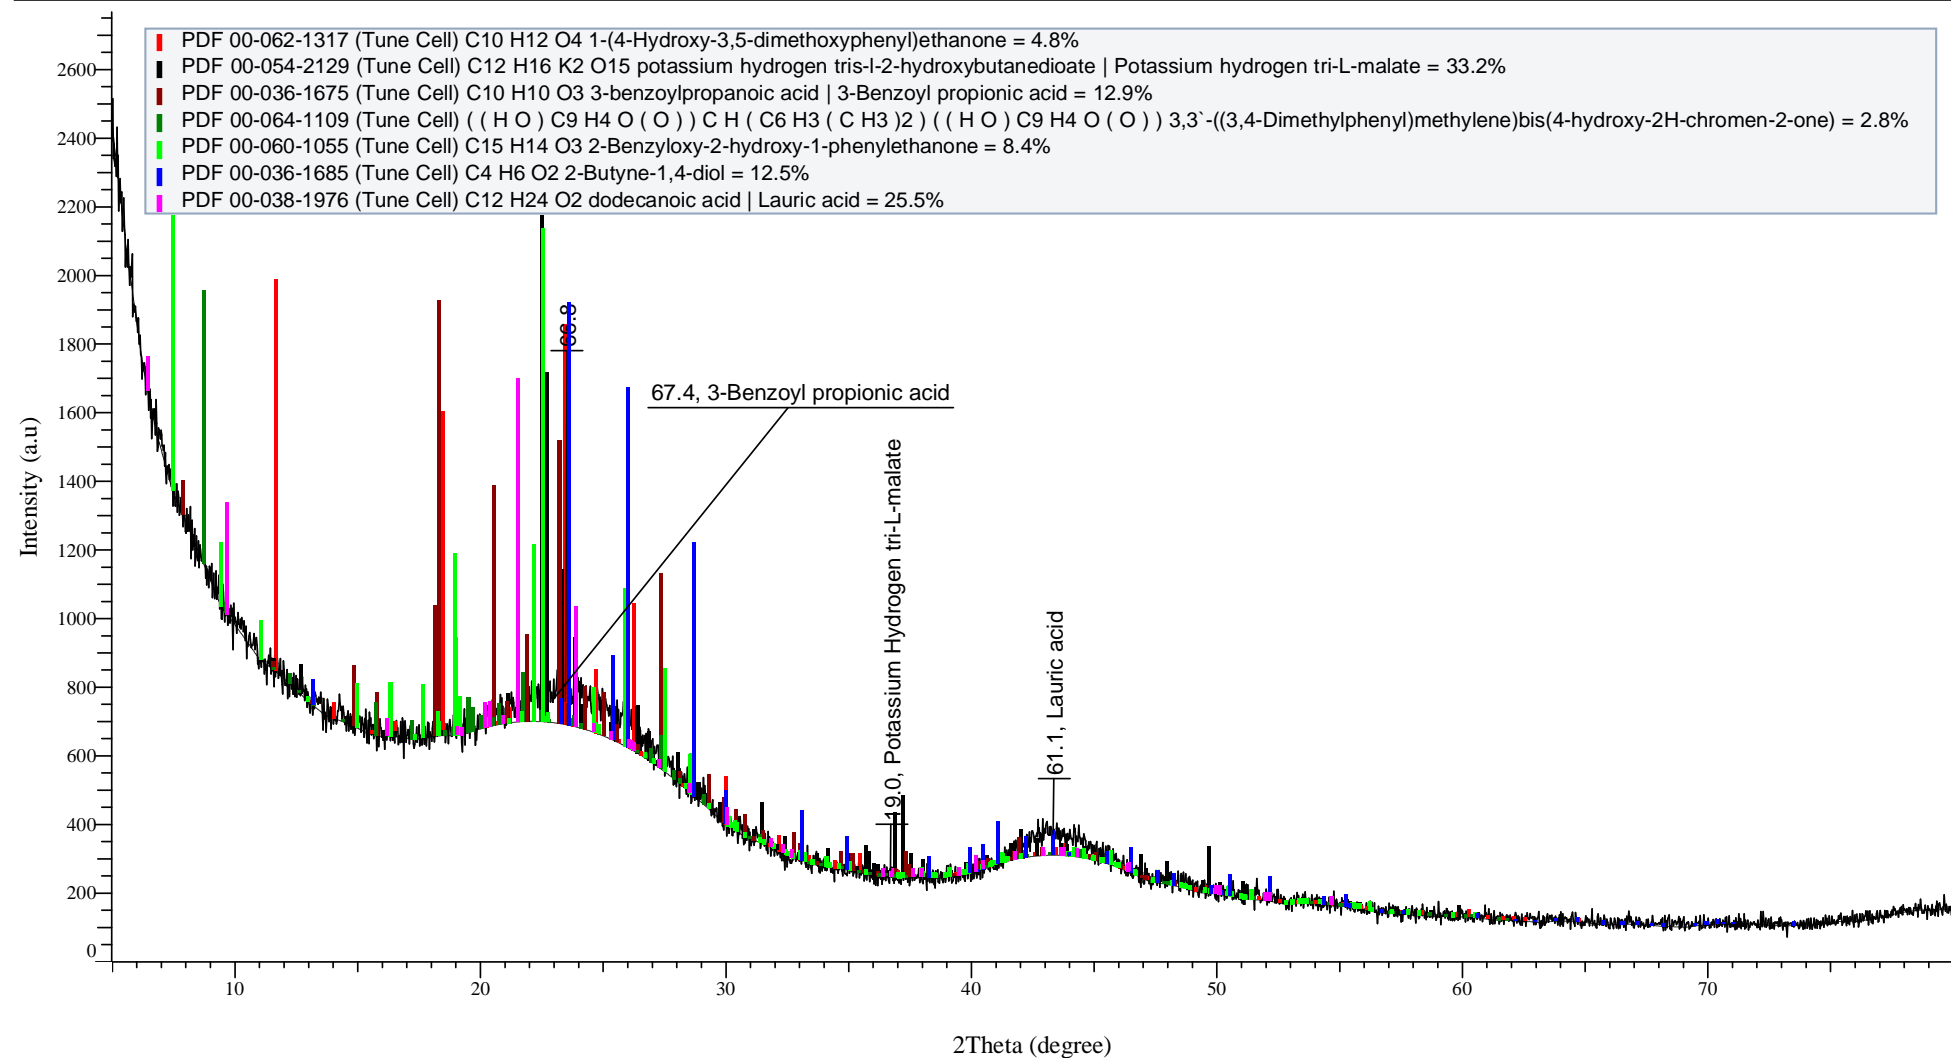



## KOH - CAC Overall Data

|                                    |                                                                                     |
|------------------------------------|-------------------------------------------------------------------------------------|
| <b>Visible</b>                     | Yes                                                                                 |
| <b>Icon</b>                        |  |
| <b>Color</b>                       |  |
| <b>Index</b>                       | 1                                                                                   |
| <b>Name</b>                        | CAC- KOH.raw                                                                        |
| <b>Parent</b>                      | 2Theta                                                                              |
| <b>Sample Name</b>                 | CAC- KOH                                                                            |
| <b>Scan's Sample Name</b>          |                                                                                     |
| <b>File Name</b>                   | CAC- KOH.raw                                                                        |
| <b>Experiment File Name</b>        |                                                                                     |
| <b>Database ID</b>                 |                                                                                     |
| <b>Scan Type</b>                   | Coupled TwoTheta/Theta                                                              |
| <b>Scan Mode</b>                   | Continuousscan                                                                      |
| <b>Scan Status</b>                 | Completed                                                                           |
| <b>Start</b>                       | 5.000                                                                               |
| <b>End</b>                         | 79.986                                                                              |
| <b>Step Size</b>                   | 0.025                                                                               |
| <b>Time per Step</b>               | 19.00                                                                               |
| <b>Axis Offset</b>                 |                                                                                     |
| <b>Temperature</b>                 | 25 °C (Room)                                                                        |
| <b>Temp. Diff.</b>                 |                                                                                     |
| <b>Heating Rate</b>                |                                                                                     |
| <b>Time Started</b>                | 15.0                                                                                |
| <b>Goniometer Radius</b>           | 217.5                                                                               |
| <b>Goniometer Radius Primary</b>   |                                                                                     |
| <b>Goniometer Radius Secondary</b> |                                                                                     |
| <b>2-theta</b>                     | 5.000                                                                               |
| <b>2-theta Osc. Amplitude</b>      | 0.000                                                                               |
| <b>2-theta Osc. Speed</b>          | 0.000                                                                               |
| <b>Theta</b>                       | 2.500                                                                               |
| <b>Theta Osc. Amplitude</b>        | 0.000                                                                               |
| <b>Theta Osc. Speed</b>            | 0.000                                                                               |
| <b>Detector</b>                    |                                                                                     |
| <b>Detector Osc. Amplitude</b>     |                                                                                     |
| <b>Detector Osc. Speed</b>         |                                                                                     |
| <b>Chi</b>                         | 0.00                                                                                |
| <b>Chi Osc. Amplitude</b>          | 0.00                                                                                |
| <b>Chi Osc. Speed</b>              | 0.00                                                                                |
| <b>Phi</b>                         | 0.00                                                                                |
| <b>Phi Osc. Amplitude</b>          | 0.00                                                                                |

|                                     |         |
|-------------------------------------|---------|
| <b>Phi Osc. Speed</b>               | 0.00    |
| <b>Gamma</b>                        | 0.00    |
| <b>X-Drive</b>                      | 0.0     |
| <b>X-drive Osc. Amplitude</b>       | 0.0     |
| <b>X-drive Osc. Speed</b>           | 0.0     |
| <b>Y-Drive</b>                      | 0.0     |
| <b>Y-drive Osc. Amplitude</b>       | 0.0     |
| <b>Y-drive Osc. Speed</b>           | 0.0     |
| <b>Z-Drive</b>                      | 0.0     |
| <b>Z-drive Osc. Amplitude</b>       | 0.0     |
| <b>Z-drive Osc. Speed</b>           | 0.0     |
| <b>Aux1</b>                         | 0.0     |
| <b>Aux2</b>                         | 0.0     |
| <b>Aux3</b>                         | 0.0     |
| <b>Anode</b>                        | Cu      |
| <b><math>k\alpha 1</math></b>       | 1.54060 |
| <b><math>k\alpha 2</math></b>       | 1.54439 |
| <b><math>k\alpha 2</math> Ratio</b> | 0.50000 |
| <b><math>k\beta</math></b>          | 1.39222 |
| <b>Generator kV</b>                 | 40.0    |
| <b>Generator mA</b>                 | 40.0    |
| <b>Detector Name</b>                | Braun   |
| <b>Calcium Channel</b>              |         |
| <b>Calcium Channel Time</b>         |         |
| <b>LynxEye 0D</b>                   | No      |
| <b>PSD Opening</b>                  |         |
| <b>PSD Opening Initial</b>          |         |
| <b>2Theta For Final PSD Opening</b> |         |
| <b>Detector Slit Opening</b>        | 12.930  |
| <b>Lower Discriminator</b>          |         |
| <b>Upper Discriminator</b>          |         |
| <b>Discriminator Width</b>          |         |
| <b>Detector Counts 0D</b>           |         |
| <b>Primary Soller slit</b>          | 4.000   |
| <b>Secondary Soller slit</b>        | 4.000   |
| <b>Center Soller slit</b>           |         |
| <b>Sample rotation speed</b>        |         |
| <b>Divergence Slit</b>              | 0.298   |
| <b>Antiscatter Slit</b>             | 0.298   |
| <b>Slit Mode</b>                    | Fixed   |
| <b>Simul. Slit Mode</b>             |         |
| <b>Center Slit</b>                  |         |

|                                   |                     |
|-----------------------------------|---------------------|
| <b>X-Offset</b>                   | 0.000               |
| <b>Displacement</b>               | 0.000               |
| <b>Y-Scale Factor</b>             | 1                   |
| <b>Y-Offset</b>                   | 0                   |
| <b>Humidity</b>                   | n.a.                |
| <b>Curvature</b>                  | 1.000               |
| <b>Threshold</b>                  | 1.000               |
| <b>Enhanced</b>                   | No                  |
| <b>BackgroundFit</b>              | No                  |
| <b>BackgroundOrder</b>            | 0.000               |
| <b>BackgroundHyperbola</b>        | No                  |
| <b>Compute Crystallinity</b>      | Yes                 |
| <b>Cristallinity - From</b>       | 5.000               |
| <b>Cristallinity - To</b>         | 79.986              |
| <b>%-Crystallinity</b>            | 31.3%               |
| <b>%-Amorphous</b>                | 68.7%               |
| <b>Global Area</b>                | 194.2               |
| <b>Reduced Area</b>               | 60.82               |
| <b>Transmission without Blank</b> |                     |
| <b>Transmission</b>               |                     |
| <b>Company Name</b>               | Malaysia            |
| <b>Operator Name</b>              | Administrator       |
| <b>User Comment</b>               |                     |
| <b>Sample Position</b>            |                     |
| <b>Creation Date/Time</b>         | 4/1/2017 4:03:20 PM |
| <b>Last Write Date/Time</b>       | 4/1/2017 4:03:20 PM |
| <b>Measurement Duration</b>       | 00:00:00            |
| <b>Set index</b>                  | Not used            |

### KOH - CAC Compute Crystallinity

|                        |          |
|------------------------|----------|
| <b>Index</b>           | 1        |
| <b>Sample Name</b>     | CAC- KOH |
| <b>%-Crystallinity</b> | 31.3%    |
| <b>%-Amorphous</b>     | 68.7%    |
| <b>Global Area</b>     | 194.2    |
| <b>Reduced Area</b>    | 60.82    |

# Modified KI - CAC

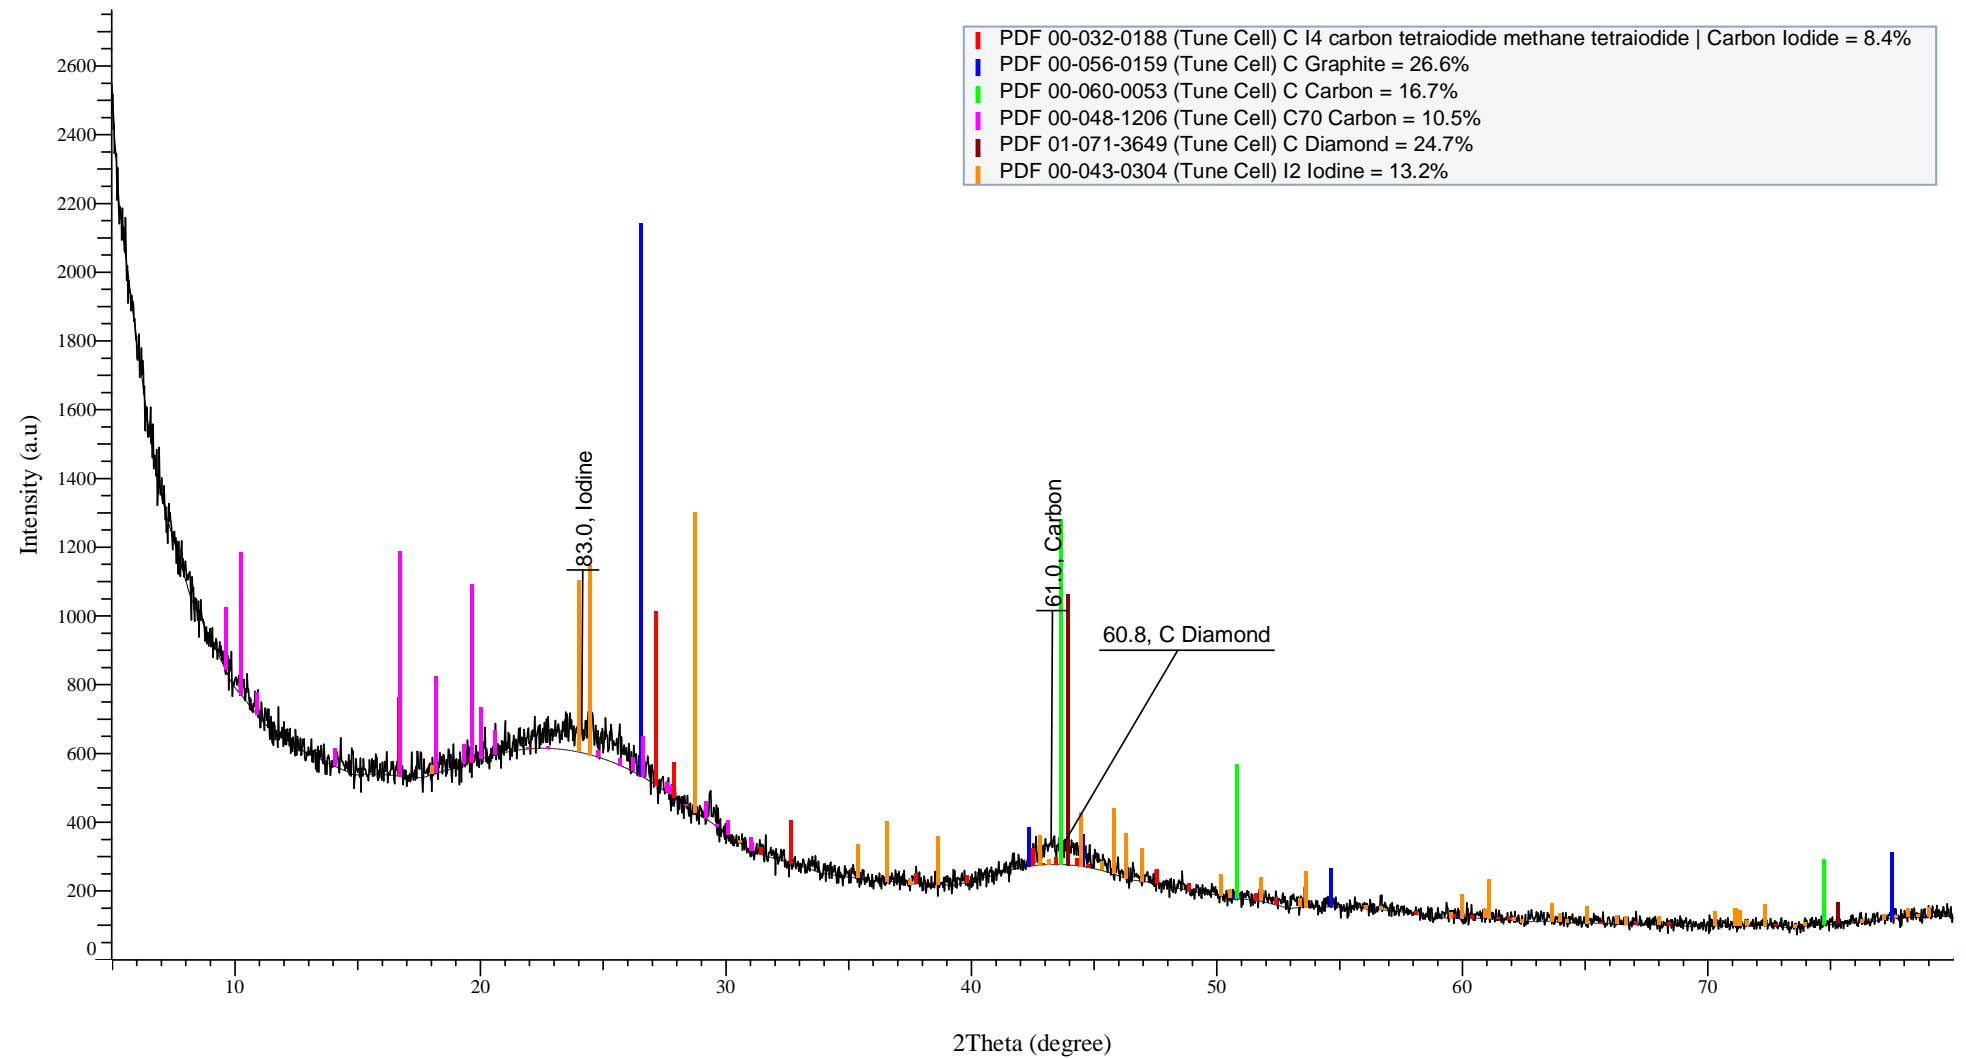

## KI - CAC Overall Data

|                                    |                                                                                     |
|------------------------------------|-------------------------------------------------------------------------------------|
| <b>Visible</b>                     | Yes                                                                                 |
| <b>Icon</b>                        |  |
| <b>Color</b>                       |  |
| <b>Index</b>                       | 1                                                                                   |
| <b>Name</b>                        | CAC- KI.raw                                                                         |
| <b>Parent</b>                      | 2Theta                                                                              |
| <b>Sample Name</b>                 | CAC- KI                                                                             |
| <b>Scan's Sample Name</b>          |                                                                                     |
| <b>File Name</b>                   | CAC- KI.raw                                                                         |
| <b>Experiment File Name</b>        |                                                                                     |
| <b>Database ID</b>                 |                                                                                     |
| <b>Scan Type</b>                   | Coupled TwoTheta/Theta                                                              |
| <b>Scan Mode</b>                   | Continuousscan                                                                      |
| <b>Scan Status</b>                 | Completed                                                                           |
| <b>Start</b>                       | 5.000                                                                               |
| <b>End</b>                         | 79.986                                                                              |
| <b>Step Size</b>                   | 0.025                                                                               |
| <b>Time per Step</b>               | 19.00                                                                               |
| <b>Axis Offset</b>                 |                                                                                     |
| <b>Temperature</b>                 | 25 °C (Room)                                                                        |
| <b>Temp. Diff.</b>                 |                                                                                     |
| <b>Heating Rate</b>                |                                                                                     |
| <b>Time Started</b>                | 14.0                                                                                |
| <b>Goniometer Radius</b>           | 217.5                                                                               |
| <b>Goniometer Radius Primary</b>   |                                                                                     |
| <b>Goniometer Radius Secondary</b> |                                                                                     |
| <b>2-theta</b>                     | 5.000                                                                               |
| <b>2-theta Osc. Amplitude</b>      | 0.000                                                                               |
| <b>2-theta Osc. Speed</b>          | 0.000                                                                               |
| <b>Theta</b>                       | 2.500                                                                               |
| <b>Theta Osc. Amplitude</b>        | 0.000                                                                               |
| <b>Theta Osc. Speed</b>            | 0.000                                                                               |
| <b>Detector</b>                    |                                                                                     |
| <b>Detector Osc. Amplitude</b>     |                                                                                     |
| <b>Detector Osc. Speed</b>         |                                                                                     |
| <b>Chi</b>                         | 0.00                                                                                |
| <b>Chi Osc. Amplitude</b>          | 0.00                                                                                |
| <b>Chi Osc. Speed</b>              | 0.00                                                                                |
| <b>Phi</b>                         | 0.00                                                                                |
| <b>Phi Osc. Amplitude</b>          | 0.00                                                                                |

|                                     |         |
|-------------------------------------|---------|
| <b>Phi Osc. Speed</b>               | 0.00    |
| <b>Gamma</b>                        | 0.00    |
| <b>X-Drive</b>                      | 0.0     |
| <b>X-drive Osc. Amplitude</b>       | 0.0     |
| <b>X-drive Osc. Speed</b>           | 0.0     |
| <b>Y-Drive</b>                      | 0.0     |
| <b>Y-drive Osc. Amplitude</b>       | 0.0     |
| <b>Y-drive Osc. Speed</b>           | 0.0     |
| <b>Z-Drive</b>                      | 0.0     |
| <b>Z-drive Osc. Amplitude</b>       | 0.0     |
| <b>Z-drive Osc. Speed</b>           | 0.0     |
| <b>Aux1</b>                         | 0.0     |
| <b>Aux2</b>                         | 0.0     |
| <b>Aux3</b>                         | 0.0     |
| <b>Anode</b>                        | Cu      |
| <b><math>k\alpha 1</math></b>       | 1.54060 |
| <b><math>k\alpha 2</math></b>       | 1.54439 |
| <b><math>k\alpha 2</math> Ratio</b> | 0.50000 |
| <b><math>k\beta</math></b>          | 1.39222 |
| <b>Generator kV</b>                 | 40.0    |
| <b>Generator mA</b>                 | 40.0    |
| <b>Detector Name</b>                | Braun   |
| <b>Calcium Channel</b>              |         |
| <b>Calcium Channel Time</b>         |         |
| <b>LynxEye 0D</b>                   | No      |
| <b>PSD Opening</b>                  |         |
| <b>PSD Opening Initial</b>          |         |
| <b>2Theta For Final PSD Opening</b> |         |
| <b>Detector Slit Opening</b>        | 12.930  |
| <b>Lower Discriminator</b>          |         |
| <b>Upper Discriminator</b>          |         |
| <b>Discriminator Width</b>          |         |
| <b>Detector Counts 0D</b>           |         |
| <b>Primary Soller slit</b>          | 4.000   |
| <b>Secondary Soller slit</b>        | 4.000   |
| <b>Center Soller slit</b>           |         |
| <b>Sample rotation speed</b>        |         |
| <b>Divergence Slit</b>              | 0.298   |
| <b>Antiscatter Slit</b>             | 0.298   |
| <b>Slit Mode</b>                    | Fixed   |
| <b>Simul. Slit Mode</b>             |         |
| <b>Center Slit</b>                  |         |

|                                   |                     |
|-----------------------------------|---------------------|
| <b>X-Offset</b>                   | 0.000               |
| <b>Displacement</b>               | 0.000               |
| <b>Y-Scale Factor</b>             | 1                   |
| <b>Y-Offset</b>                   | 0                   |
| <b>Humidity</b>                   | n.a.                |
| <b>Curvature</b>                  | 1.000               |
| <b>Threshold</b>                  | 1.000               |
| <b>Enhanced</b>                   | No                  |
| <b>BackgroundFit</b>              | No                  |
| <b>BackgroundOrder</b>            | 0.000               |
| <b>BackgroundHyperbola</b>        | No                  |
| <b>Compute Crystallinity</b>      | Yes                 |
| <b>Cristallinity - From</b>       | 5.000               |
| <b>Cristallinity - To</b>         | 79.986              |
| <b>%-Crystallinity</b>            | 26.4%               |
| <b>%-Amorphous</b>                | 73.6%               |
| <b>Global Area</b>                | 187.5               |
| <b>Reduced Area</b>               | 49.59               |
| <b>Transmission without Blank</b> |                     |
| <b>Transmission</b>               |                     |
| <b>Company Name</b>               | Malaysia            |
| <b>Operator Name</b>              | Administrator       |
| <b>User Comment</b>               |                     |
| <b>Sample Position</b>            |                     |
| <b>Creation Date/Time</b>         | 4/1/2017 3:57:40 PM |
| <b>Last Write Date/Time</b>       | 4/1/2017 3:57:40 PM |
| <b>Measurement Duration</b>       | 00:00:00            |
| <b>Set index</b>                  | Not used            |



## KI - CAC Compute Crystallinity

|                        |         |
|------------------------|---------|
| <b>Index</b>           | 1       |
| <b>Sample Name</b>     | CAC- KI |
| <b>%-Crystallinity</b> | 26.4%   |
| <b>%-Amorphous</b>     | 73.6%   |
| <b>Global Area</b>     | 187.5   |
| <b>Reduced Area</b>    | 49.59   |

# Modified CuSO4 - CAC

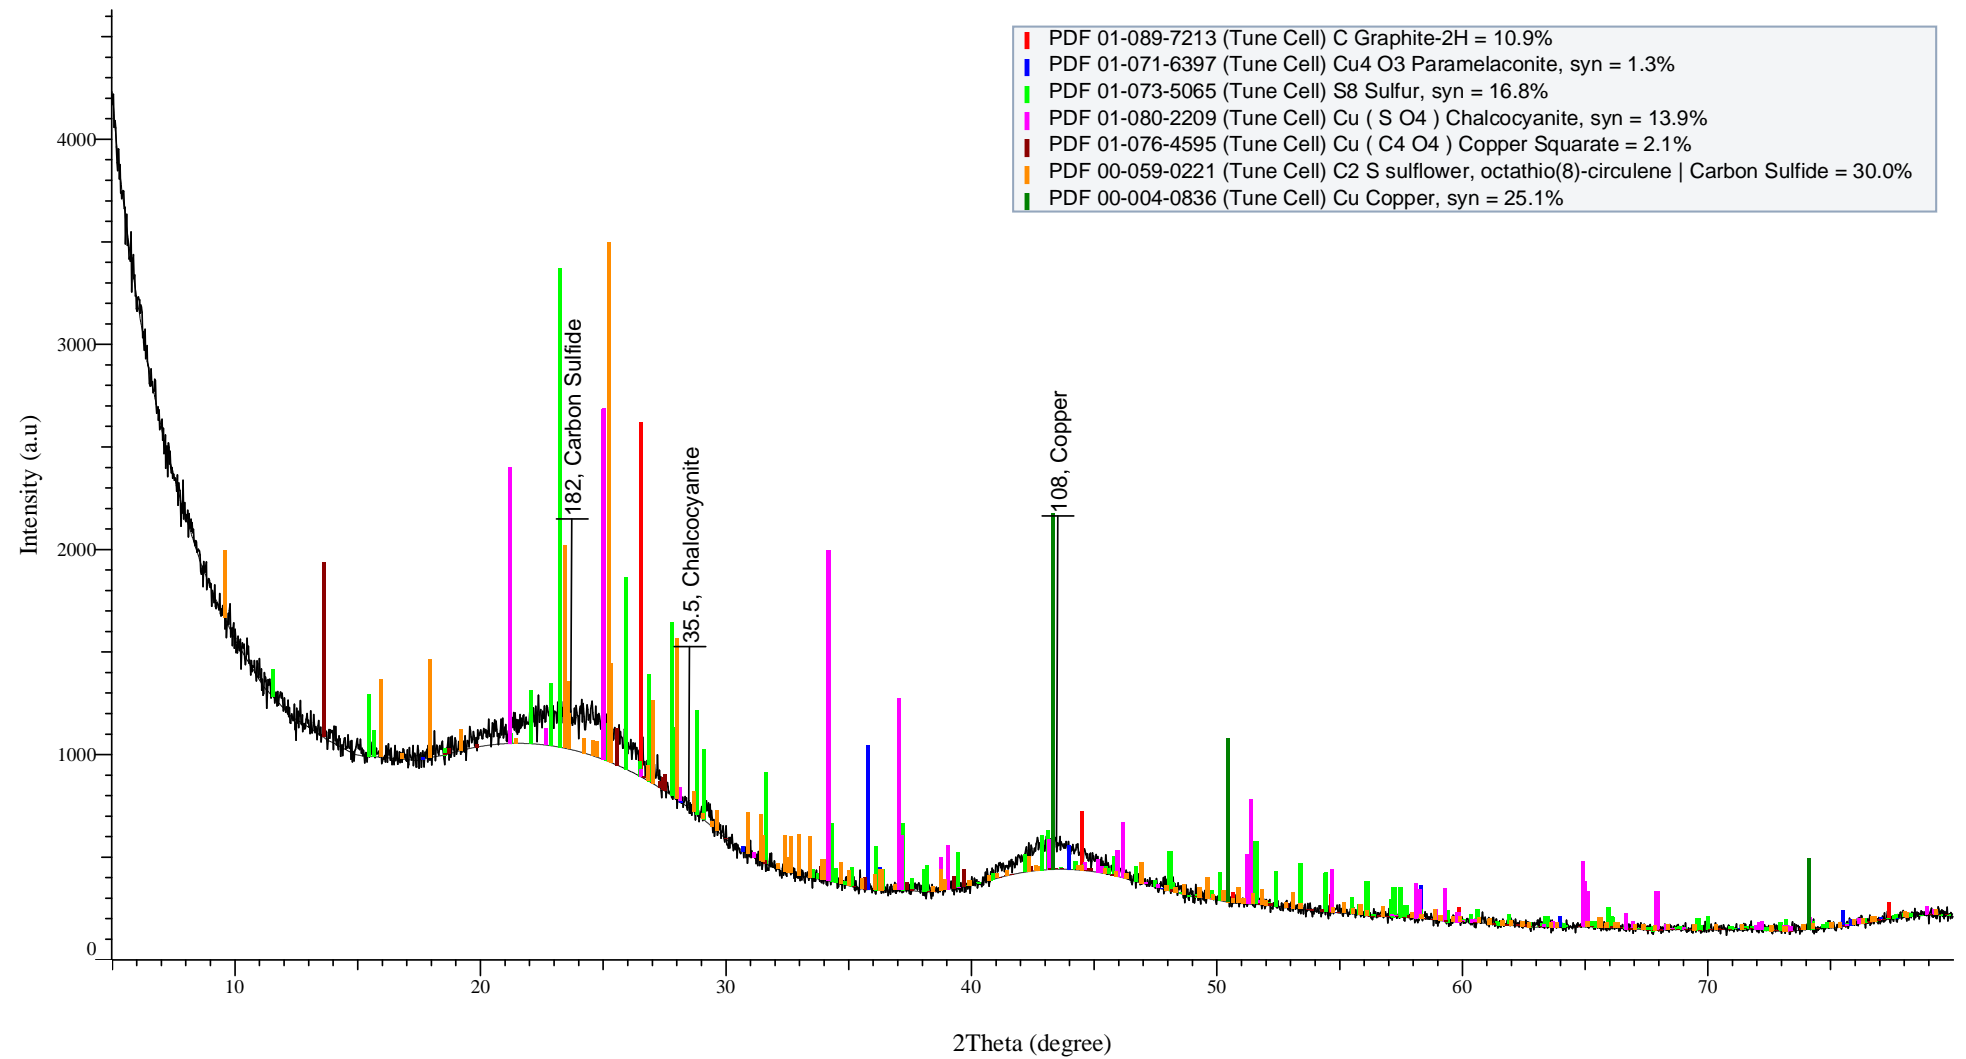

## CuSO4- CAC Overall Data

|                                    |                                                                                     |
|------------------------------------|-------------------------------------------------------------------------------------|
| <b>Visible</b>                     | Yes                                                                                 |
| <b>Icon</b>                        |  |
| <b>Color</b>                       |  |
| <b>Index</b>                       | 1                                                                                   |
| <b>Name</b>                        | CAC- CuSO4.raw                                                                      |
| <b>Parent</b>                      | 2Theta                                                                              |
| <b>Sample Name</b>                 | CAC- CuSO4                                                                          |
| <b>Scan's Sample Name</b>          |                                                                                     |
| <b>File Name</b>                   | CAC- CuSO4.raw                                                                      |
| <b>Experiment File Name</b>        |                                                                                     |
| <b>Database ID</b>                 |                                                                                     |
| <b>Scan Type</b>                   | Coupled TwoTheta/Theta                                                              |
| <b>Scan Mode</b>                   | Continuousscan                                                                      |
| <b>Scan Status</b>                 | Completed                                                                           |
| <b>Start</b>                       | 5.000                                                                               |
| <b>End</b>                         | 79.986                                                                              |
| <b>Step Size</b>                   | 0.025                                                                               |
| <b>Time per Step</b>               | 19.00                                                                               |
| <b>Axis Offset</b>                 |                                                                                     |
| <b>Temperature</b>                 | 25 °C (Room)                                                                        |
| <b>Temp. Diff.</b>                 |                                                                                     |
| <b>Heating Rate</b>                |                                                                                     |
| <b>Time Started</b>                | 15.0                                                                                |
| <b>Goniometer Radius</b>           | 217.5                                                                               |
| <b>Goniometer Radius Primary</b>   |                                                                                     |
| <b>Goniometer Radius Secondary</b> |                                                                                     |
| <b>2-theta</b>                     | 5.000                                                                               |
| <b>2-theta Osc. Amplitude</b>      | 0.000                                                                               |
| <b>2-theta Osc. Speed</b>          | 0.000                                                                               |
| <b>Theta</b>                       | 2.500                                                                               |
| <b>Theta Osc. Amplitude</b>        | 0.000                                                                               |
| <b>Theta Osc. Speed</b>            | 0.000                                                                               |
| <b>Detector</b>                    |                                                                                     |
| <b>Detector Osc. Amplitude</b>     |                                                                                     |
| <b>Detector Osc. Speed</b>         |                                                                                     |
| <b>Chi</b>                         | 0.00                                                                                |
| <b>Chi Osc. Amplitude</b>          | 0.00                                                                                |
| <b>Chi Osc. Speed</b>              | 0.00                                                                                |
| <b>Phi</b>                         | 0.00                                                                                |
| <b>Phi Osc. Amplitude</b>          | 0.00                                                                                |

|                                     |         |
|-------------------------------------|---------|
| <b>Phi Osc. Speed</b>               | 0.00    |
| <b>Gamma</b>                        | 0.00    |
| <b>X-Drive</b>                      | 0.0     |
| <b>X-drive Osc. Amplitude</b>       | 0.0     |
| <b>X-drive Osc. Speed</b>           | 0.0     |
| <b>Y-Drive</b>                      | 0.0     |
| <b>Y-drive Osc. Amplitude</b>       | 0.0     |
| <b>Y-drive Osc. Speed</b>           | 0.0     |
| <b>Z-Drive</b>                      | 0.0     |
| <b>Z-drive Osc. Amplitude</b>       | 0.0     |
| <b>Z-drive Osc. Speed</b>           | 0.0     |
| <b>Aux1</b>                         | 0.0     |
| <b>Aux2</b>                         | 0.0     |
| <b>Aux3</b>                         | 0.0     |
| <b>Anode</b>                        | Cu      |
| <b><math>k\alpha 1</math></b>       | 1.54060 |
| <b><math>k\alpha 2</math></b>       | 1.54439 |
| <b><math>k\alpha 2</math> Ratio</b> | 0.50000 |
| <b><math>k\beta</math></b>          | 1.39222 |
| <b>Generator kV</b>                 | 40.0    |
| <b>Generator mA</b>                 | 40.0    |
| <b>Detector Name</b>                | Braun   |
| <b>Calcium Channel</b>              |         |
| <b>Calcium Channel Time</b>         |         |
| <b>LynxEye 0D</b>                   | No      |
| <b>PSD Opening</b>                  |         |
| <b>PSD Opening Initial</b>          |         |
| <b>2Theta For Final PSD Opening</b> |         |
| <b>Detector Slit Opening</b>        | 12.930  |
| <b>Lower Discriminator</b>          |         |
| <b>Upper Discriminator</b>          |         |
| <b>Discriminator Width</b>          |         |
| <b>Detector Counts 0D</b>           |         |
| <b>Primary Soller slit</b>          | 4.000   |
| <b>Secondary Soller slit</b>        | 4.000   |
| <b>Center Soller slit</b>           |         |
| <b>Sample rotation speed</b>        |         |
| <b>Divergence Slit</b>              | 0.298   |
| <b>Antiscatter Slit</b>             | 0.298   |
| <b>Slit Mode</b>                    | Fixed   |
| <b>Simul. Slit Mode</b>             |         |
| <b>Center Slit</b>                  |         |

|                                   |                     |
|-----------------------------------|---------------------|
| <b>X-Offset</b>                   | 0.000               |
| <b>Displacement</b>               | 0.000               |
| <b>Y-Scale Factor</b>             | 1                   |
| <b>Y-Offset</b>                   | 0                   |
| <b>Humidity</b>                   | n.a.                |
| <b>Curvature</b>                  | 1.000               |
| <b>Threshold</b>                  | 1.000               |
| <b>Enhanced</b>                   | No                  |
| <b>BackgroundFit</b>              | No                  |
| <b>BackgroundOrder</b>            | 0.000               |
| <b>BackgroundHyperbola</b>        | No                  |
| <b>Compute Crystallinity</b>      | Yes                 |
| <b>Cristallinity - From</b>       | 5.000               |
| <b>Cristallinity - To</b>         | 79.986              |
| <b>%-Crystallinity</b>            | 31.6%               |
| <b>%-Amorphous</b>                | 68.4%               |
| <b>Global Area</b>                | 329.1               |
| <b>Reduced Area</b>               | 104.0               |
| <b>Transmission without Blank</b> |                     |
| <b>Transmission</b>               |                     |
| <b>Company Name</b>               | Malaysia            |
| <b>Operator Name</b>              | Administrator       |
| <b>User Comment</b>               |                     |
| <b>Sample Position</b>            |                     |
| <b>Creation Date/Time</b>         | 4/1/2017 3:46:21 PM |
| <b>Last Write Date/Time</b>       | 4/1/2017 3:46:21 PM |
| <b>Measurement Duration</b>       | 00:00:00            |
| <b>Set index</b>                  | Not used            |

## CuSO4 - CAC Compute Crystallinity

|                        |            |
|------------------------|------------|
| <b>Index</b>           | 1          |
| <b>Sample Name</b>     | CAC- CuSO4 |
| <b>%-Crystallinity</b> | 31.6%      |
| <b>%-Amorphous</b>     | 68.4%      |
| <b>Global Area</b>     | 329.1      |
| <b>Reduced Area</b>    | 104.0      |
