# Supplementary material for: Removal of hydrogen sulfide from a biogas mimic by using impregnated activated carbon adsorbent
Source: PubMed Central journal article supplement (PMC6372171; doi:10.1371/journal.pone.0211713), 2019-02-12
Supplement: pone.0211713.s005.pdf [file pone.0211713.s005.pdf]

Sample: 001-783-  
ZnAC2\_CAC\_Adsorp  
Operator: Jack  
Submitter: Amy  
Bar Code:  
File: C:\2020\data\_ini\001-  
783.SMP

|                    |                               |                         |                                  |
|--------------------|-------------------------------|-------------------------|----------------------------------|
| Started:           | 04-Nov-17 7:31:28 AM          | Analysis adsorptive:    | N2                               |
| Completed:         | 04-Nov-17 5:49:57 PM          | Analysis bath temp.:    | -195.751 °C                      |
| Report time:       | 13-Nov-17 6:31:54 PM          | Thermal correction:     | No                               |
| Sample mass:       | 0.1680 g                      | Warm free space:        | 27.7257 cm <sup>3</sup> Measured |
| Cold free space:   | 85.2131 cm <sup>3</sup>       | Equilibration interval: | 10 s                             |
| Low pressure dose: | 5.0000 cm <sup>3</sup> /g STP | Sample density:         | 1.000 g/cm <sup>3</sup>          |
| Automatic degas:   | Yes                           |                         |                                  |

## Summary Report

### Surface Area

|                                                                                         |                            |
|-----------------------------------------------------------------------------------------|----------------------------|
| Single point surface area at P/Po = 0.201206492:                                        | 643.0161 m <sup>2</sup> /g |
| BET Surface Area:                                                                       | 625.4326 m <sup>2</sup> /g |
| Langmuir Surface Area:                                                                  | 826.5136 m <sup>2</sup> /g |
| t-Plot Micropore Area:                                                                  | 512.1831 m <sup>2</sup> /g |
| t-Plot external surface area:                                                           | 113.2495 m <sup>2</sup> /g |
| BJH Adsorption cumulative surface area of pores between 17.000 Å and 3,000.000 Å width: | 48.988 m <sup>2</sup> /g   |
| BJH Desorption cumulative surface area of pores                                         |                            |

between 17.000 Å and  
3,000.000 Å width: 52.8711 m<sup>2</sup>/g

#### Pore Volume

Single point adsorption total  
pore volume of pores  
less than 1,294.169 Å width at  
P/Po = 0.984813395: 0.301218 cm<sup>3</sup>/g

Single point desorption total  
pore volume of pores  
less than 755.975 Å width at  
P/Po = 0.973713272: 0.300687 cm<sup>3</sup>/g

t-Plot micropore volume: 0.236326 cm<sup>3</sup>/g

BJH Adsorption cumulative  
volume of pores  
between 17.000 Å and  
3,000.000 Å width: 0.040593 cm<sup>3</sup>/g

BJH Desorption cumulative  
volume of pores  
between 17.000 Å and  
3,000.000 Å width: 0.041372 cm<sup>3</sup>/g

#### Pore Size

Adsorption average pore  
diameter (4V/A by BET): 19.2646 Å

Desorption average pore  
diameter (4V/A by BET): 19.2306 Å

BJH Adsorption average pore  
width (4V/A): 33.145 Å

BJH Desorption average pore  
width (4V/A): 31.300 Å

Sample: 001-782-ZnAC2-CAC-Desorp  
Operator: Jack  
Submitter: Amy  
Bar Code:  
File: C:\2020\data\_in\001-782.SMP

|                    |                               |                         |                                  |
|--------------------|-------------------------------|-------------------------|----------------------------------|
| Started:           | 03-Nov-17 9:41:47 AM          | Analysis adsorptive:    | N2                               |
| Completed:         | 03-Nov-17 10:08:38 PM         | Analysis bath temp.:    | -195.771 °C                      |
| Report time:       | 13-Nov-17 6:31:53 PM          | Thermal correction:     | No                               |
| Sample mass:       | 0.1767 g                      | Warm free space:        | 27.5616 cm <sup>3</sup> Measured |
| Cold free space:   | 85.0576 cm <sup>3</sup>       | Equilibration interval: | 10 s                             |
| Low pressure dose: | 5.0000 cm <sup>3</sup> /g STP | Sample density:         | 1.000 g/cm <sup>3</sup>          |
| Automatic degas:   | Yes                           |                         |                                  |

## Summary Report

### Surface Area

Single point surface area at P/Po = 0.201178113: 740.0198 m<sup>2</sup>/g

BET Surface Area: 717.4079 m<sup>2</sup>/g

Langmuir Surface Area: 953.2622 m<sup>2</sup>/g

t-Plot Micropore Area: 578.5584 m<sup>2</sup>/g

t-Plot external surface area: 138.8495 m<sup>2</sup>/g

BJH Adsorption cumulative surface area of pores between 17.000 Å and 3,000.000 Å width: 60.398 m<sup>2</sup>/g

BJH Desorption cumulative surface area of pores

between 17.000 Å and  
3,000.000 Å width: 65.5456 m<sup>2</sup>/g

#### Pore Volume

Single point adsorption total  
pore volume of pores  
less than 1,308.001 Å width  
at P/Po = 0.984976849: 0.348118 cm<sup>3</sup>/g

Single point desorption total  
pore volume of pores  
less than 754.765 Å width at  
P/Po = 0.973670152: 0.347410 cm<sup>3</sup>/g

t-Plot micropore volume: 0.268258 cm<sup>3</sup>/g

BJH Adsorption cumulative  
volume of pores  
between 17.000 Å and  
3,000.000 Å width: 0.048945 cm<sup>3</sup>/g

BJH Desorption cumulative  
volume of pores  
between 17.000 Å and  
3,000.000 Å width: 0.050661 cm<sup>3</sup>/g

#### Pore Size

Adsorption average pore  
diameter (4V/A by BET): 19.4098 Å

Desorption average pore  
diameter (4V/A by BET): 19.3703 Å

BJH Adsorption average  
pore width (4V/A): 32.415 Å

BJH Desorption average  
pore width (4V/A): 30.917 Å
